# Supplementary material for: Pollen calendars and maps of allergenic pollen in North America
Source: PubMed Central journal article supplement (PMC6934246; doi:10.1007/s10453-019-09601-2), 2019-07-17
Supplement: 10453_2019_9601_MOESM1_ESM.pdf [file 10453_2019_9601_MOESM1_ESM.pdf]

1 **Location-specific Pollen Calendars**

2

3 Pollen calendars for the station at the city and state or province listed in title of figure. Daily  
4 mean climatology of pollen concentration by pollen taxa, 2003-2017. Percent abundance is based  
5 on the sum of API over all pollen taxa. Only pollen taxa with average API over 150 grain-  
6 day/m<sup>3</sup> are shown. Missing data are shaded grey and denoted NaN in the colorbar.

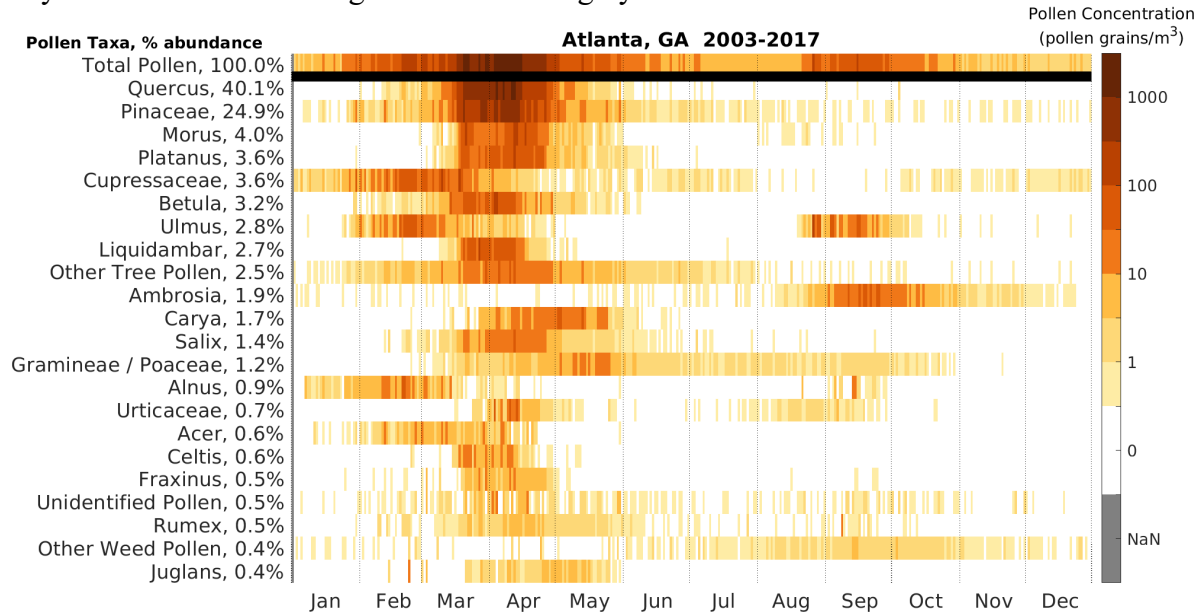

7

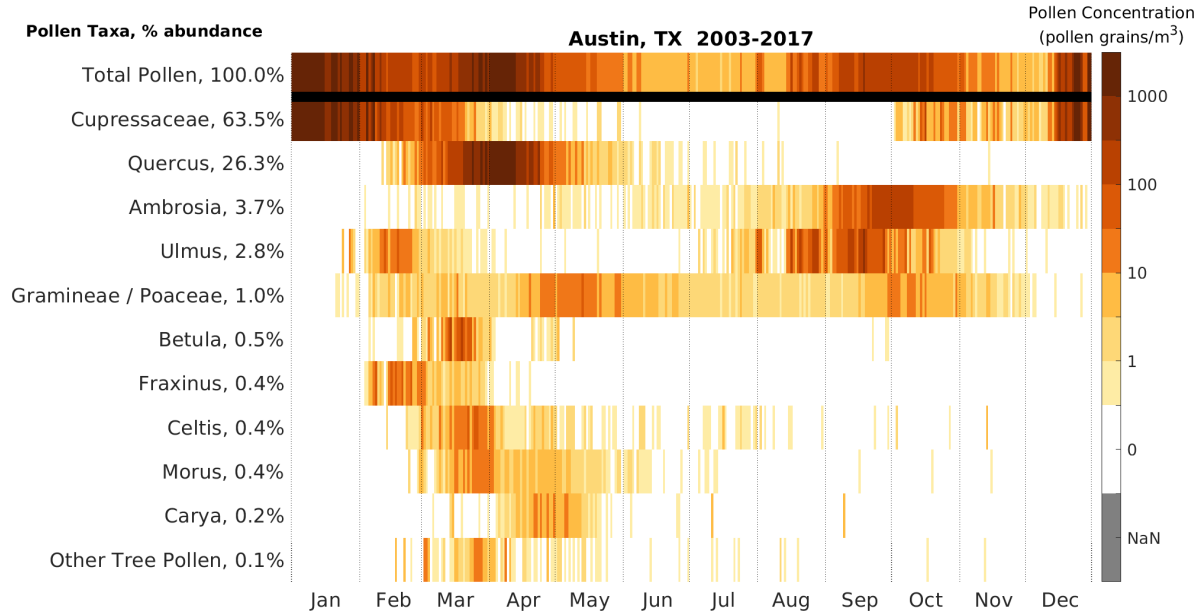

8

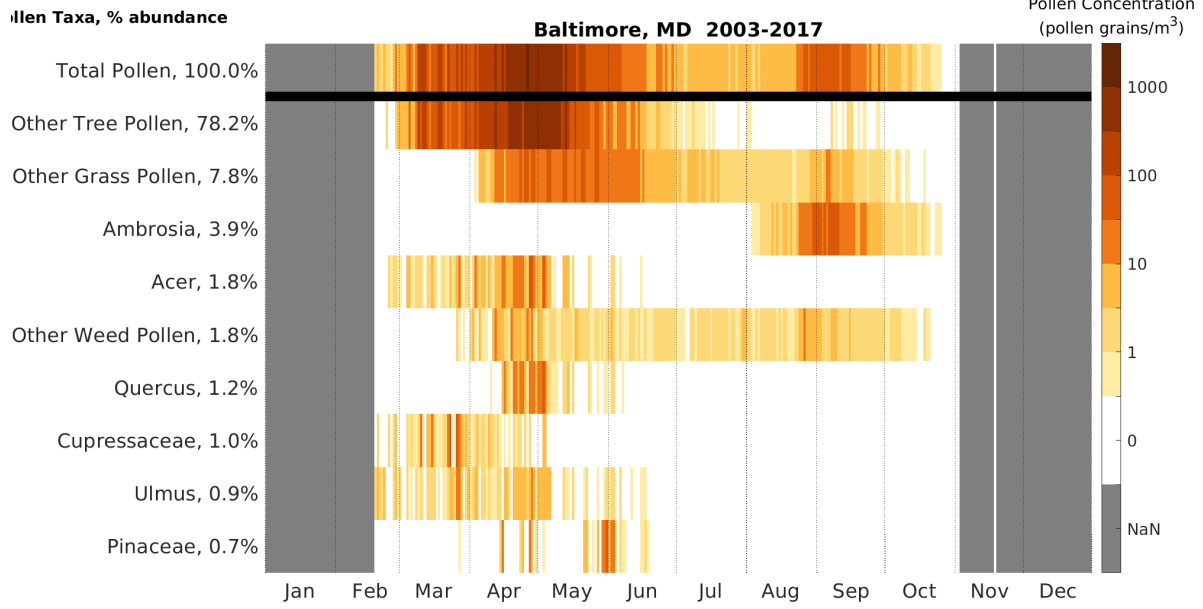

9

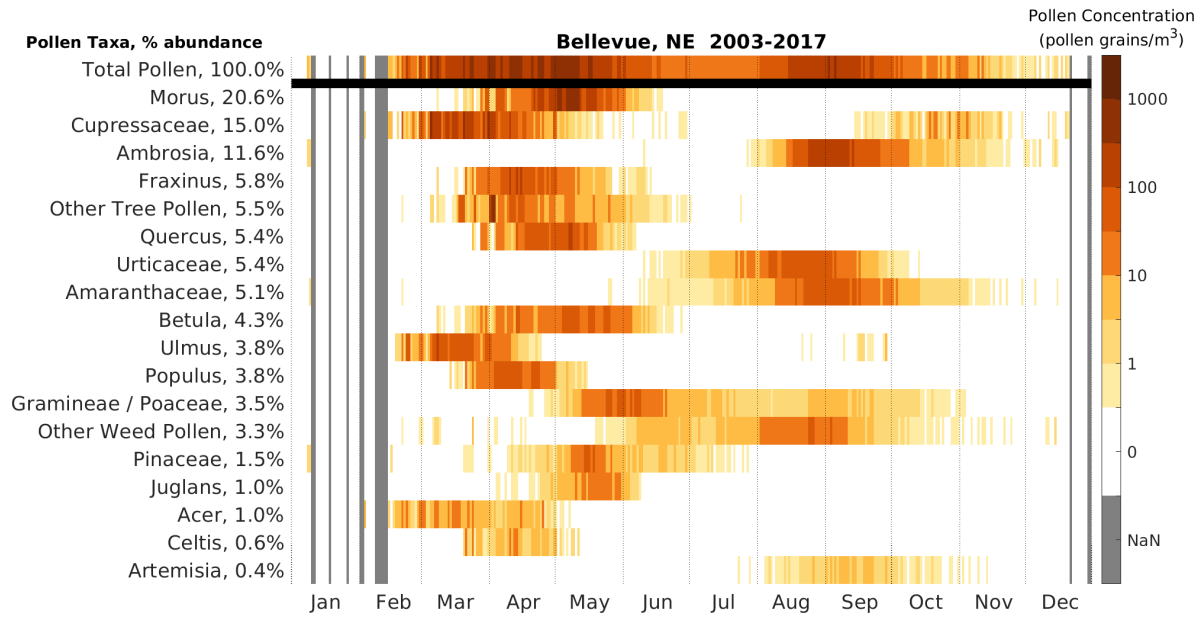

10

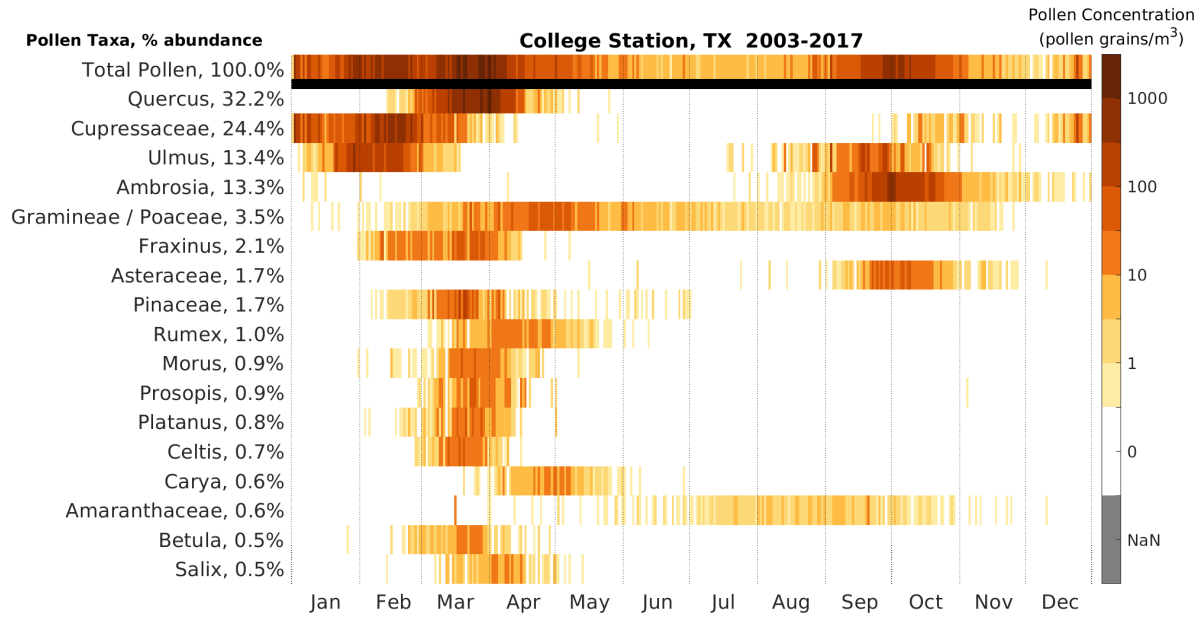

11

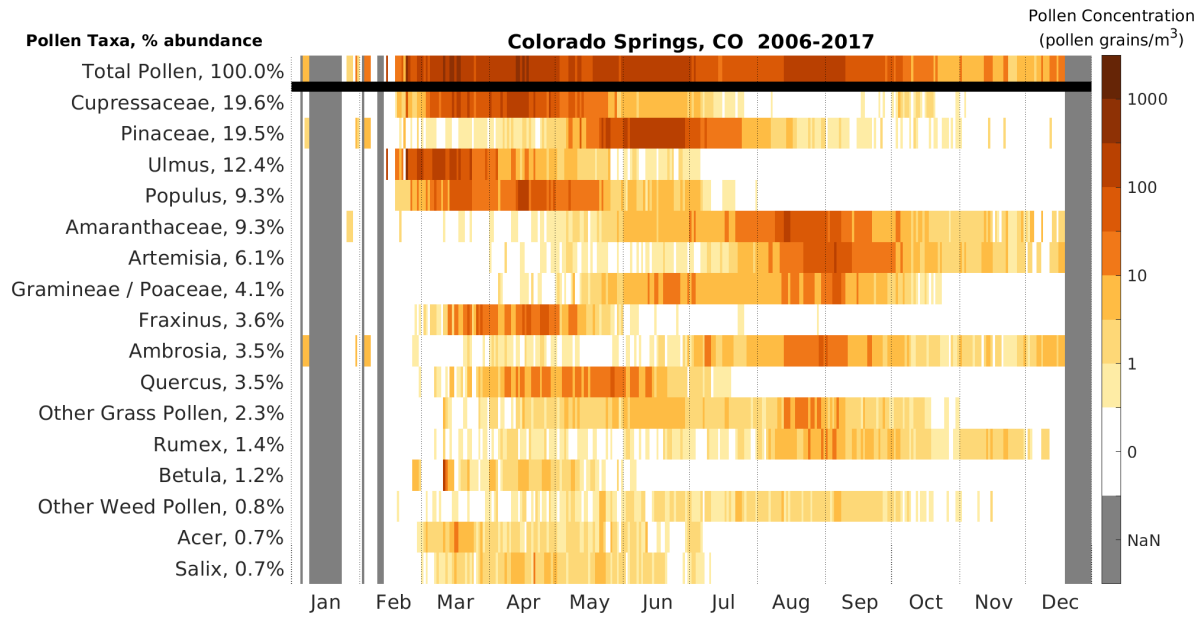

12

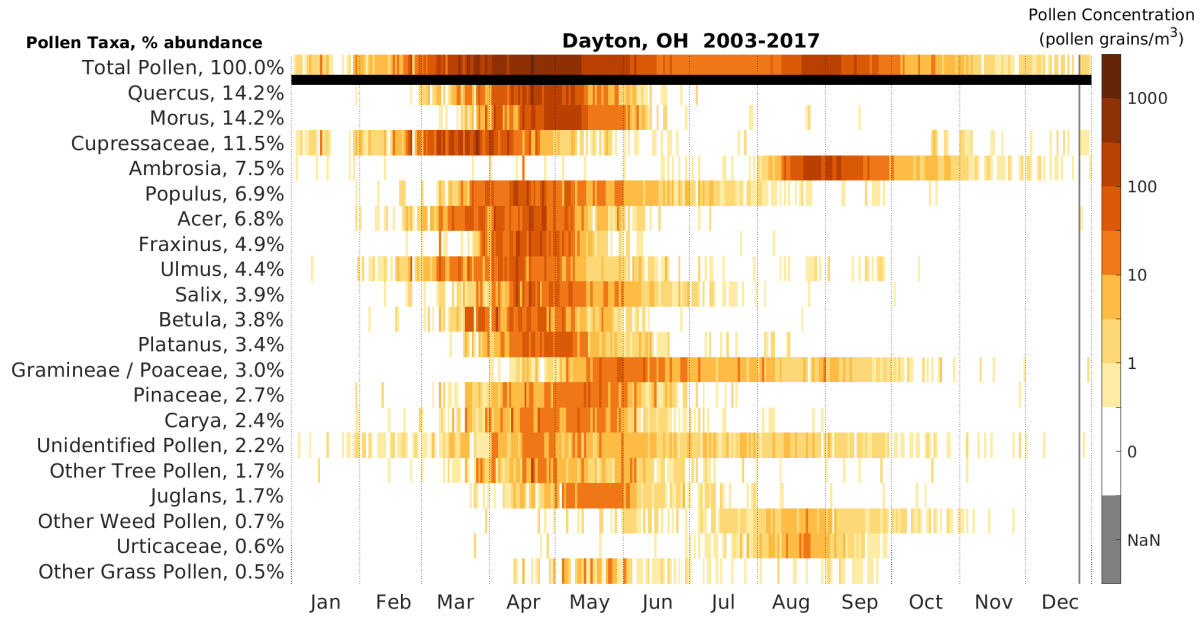

13

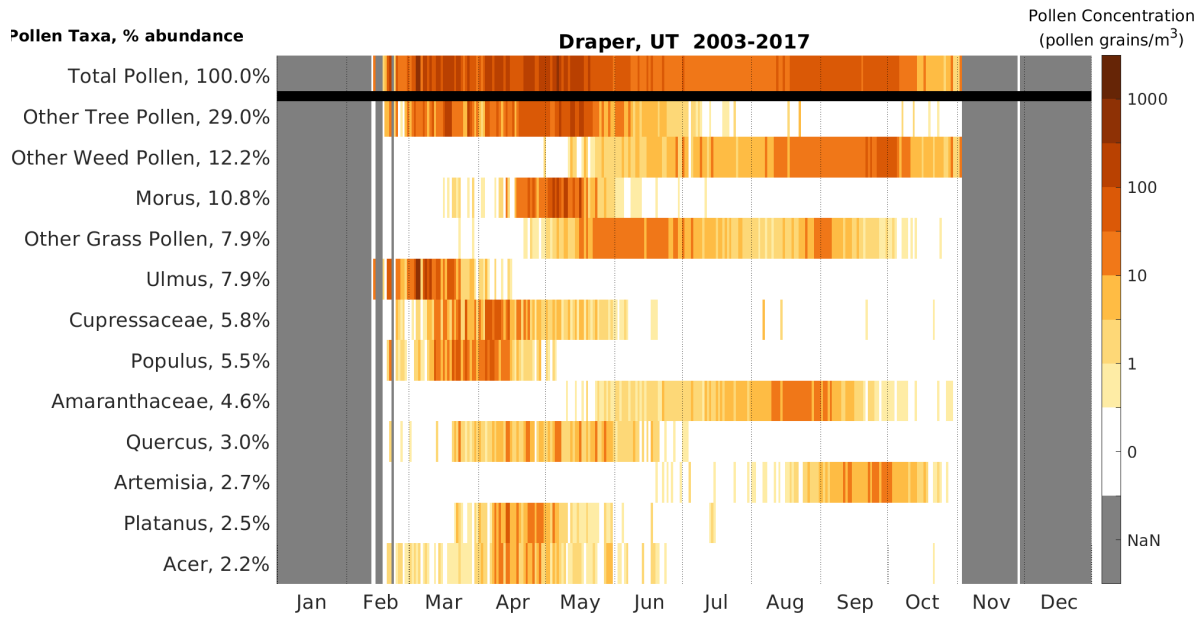

14



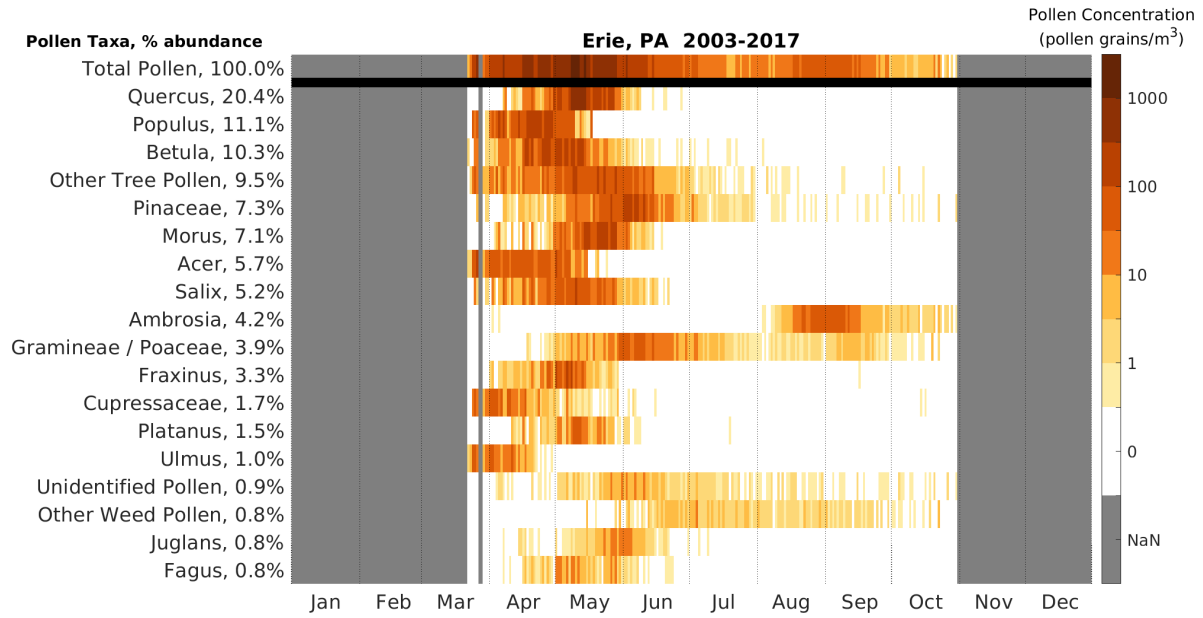

15

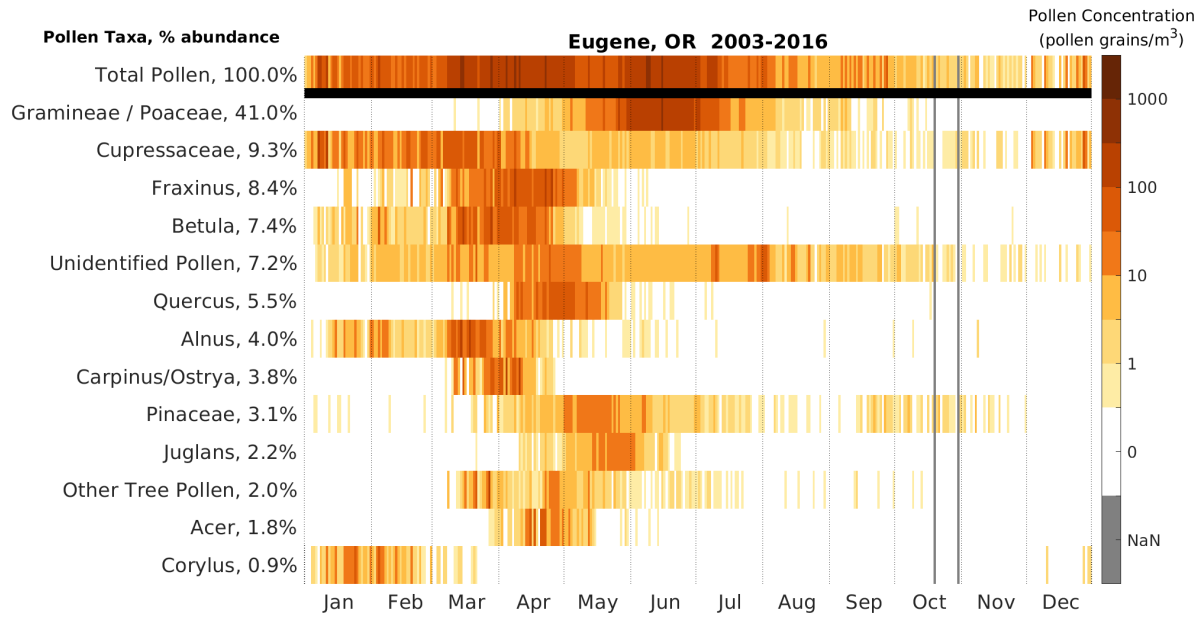

16

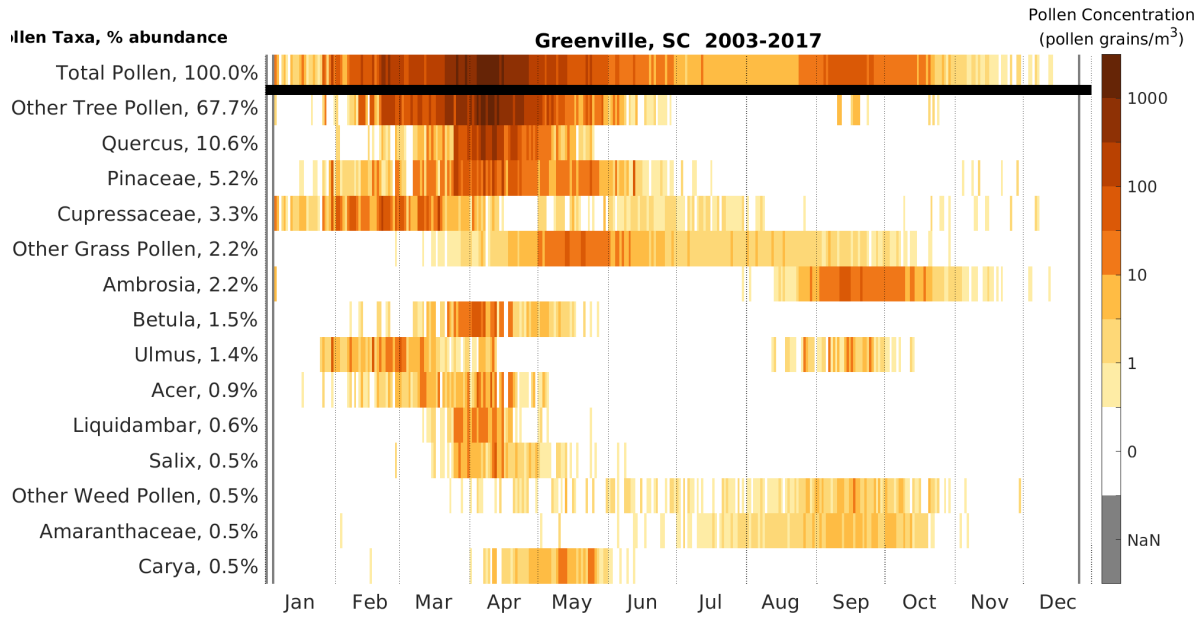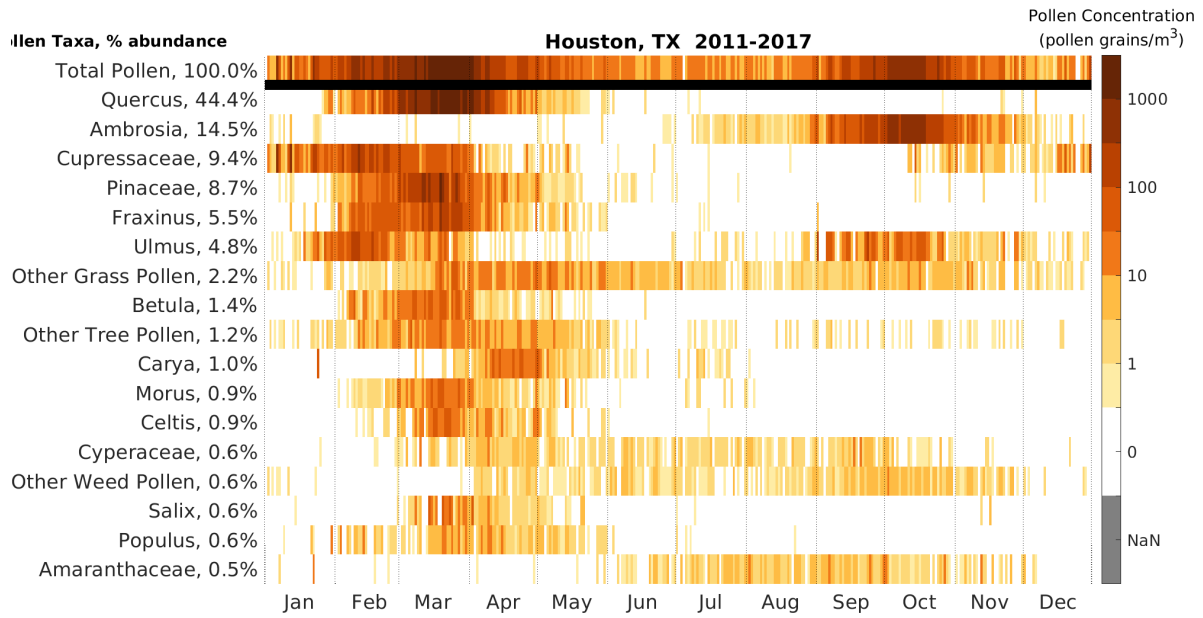

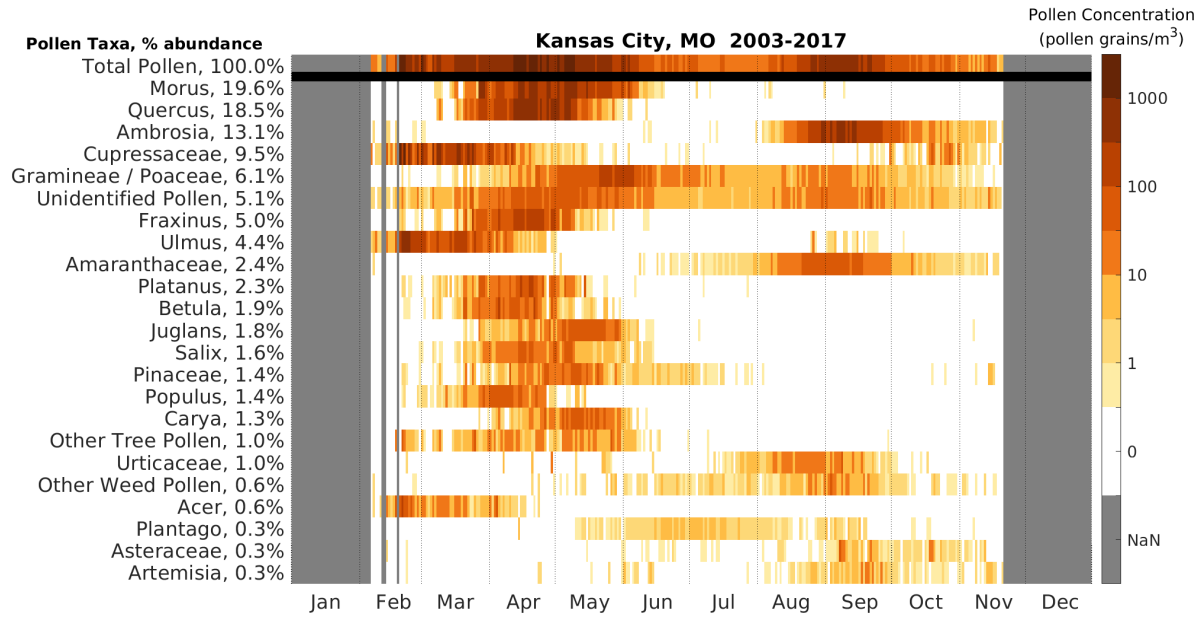

19

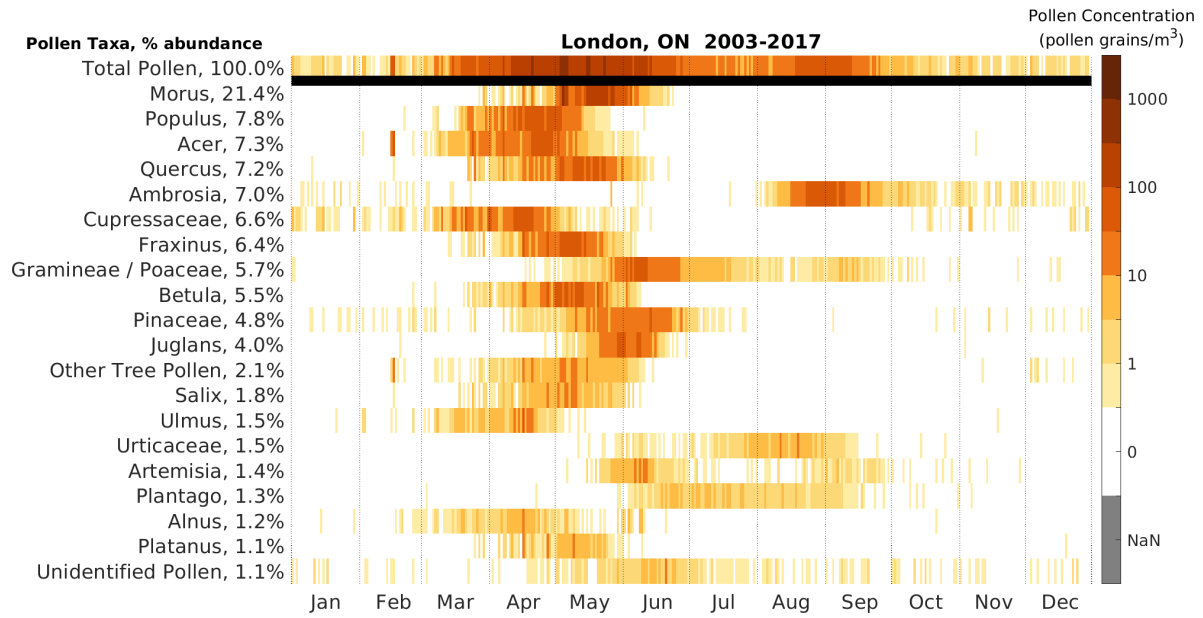

20

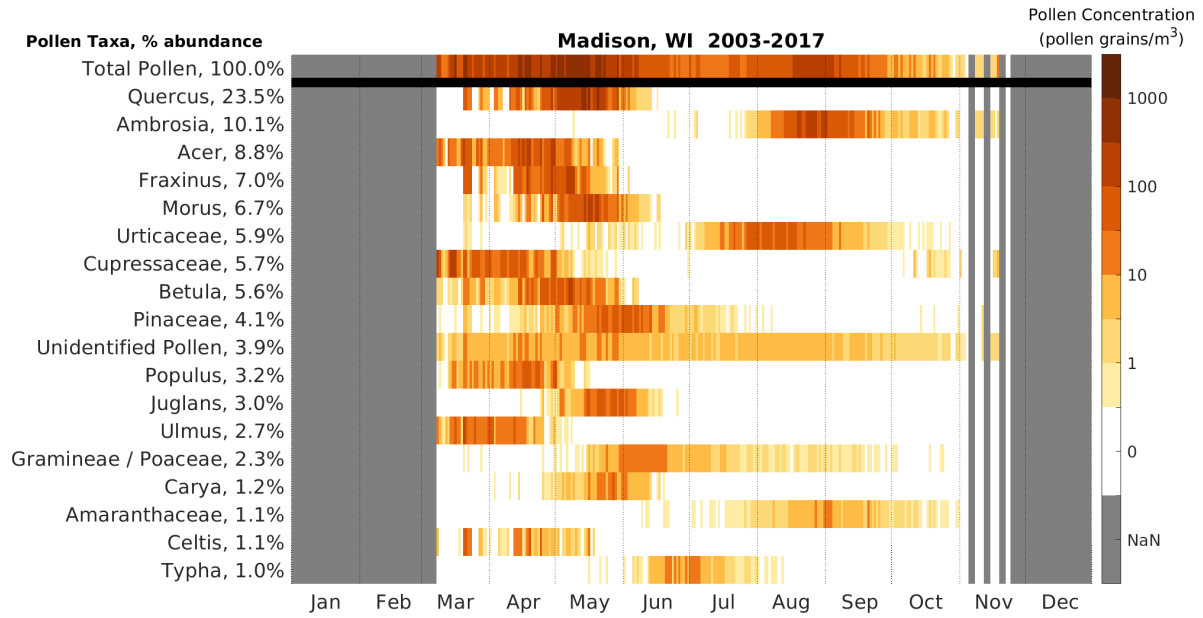

21

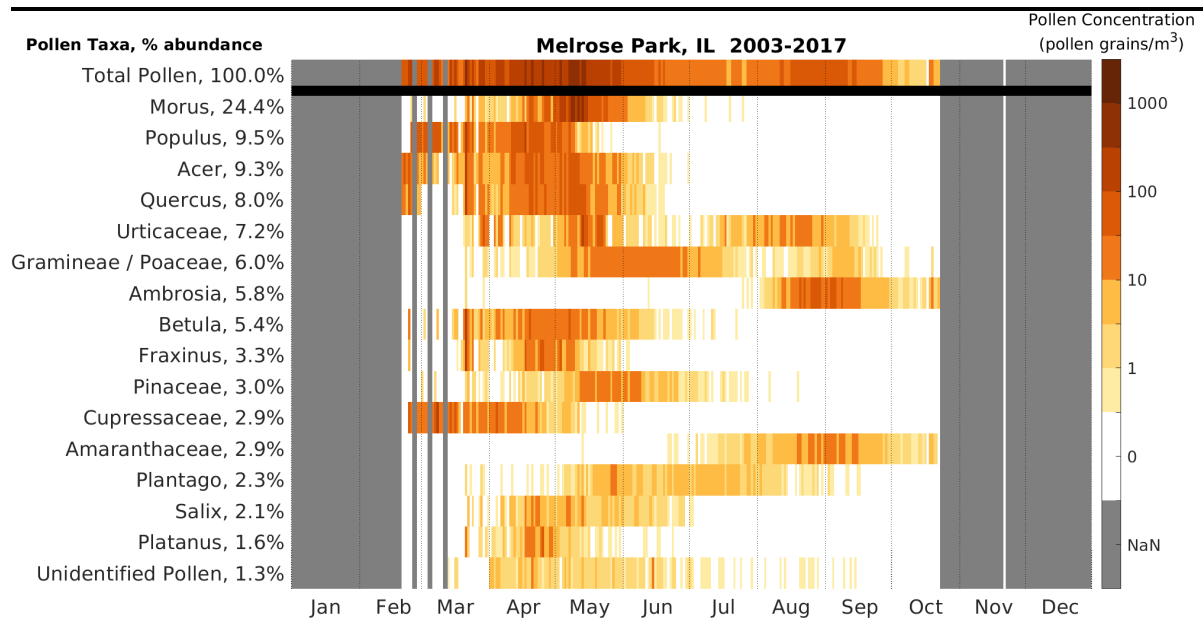

22

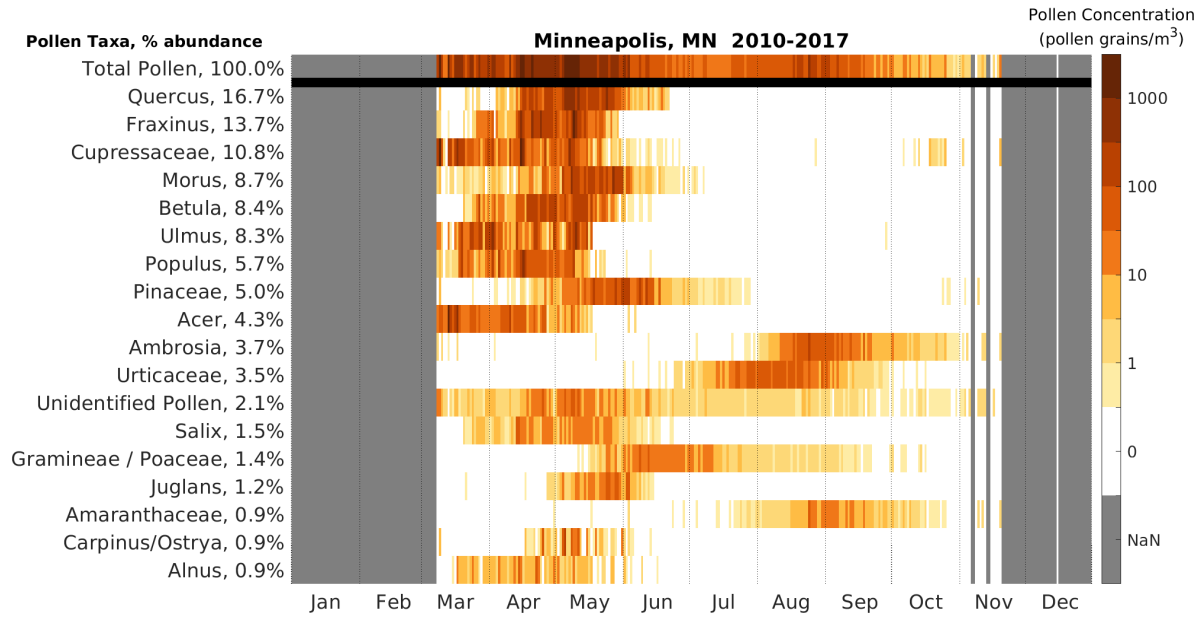

23

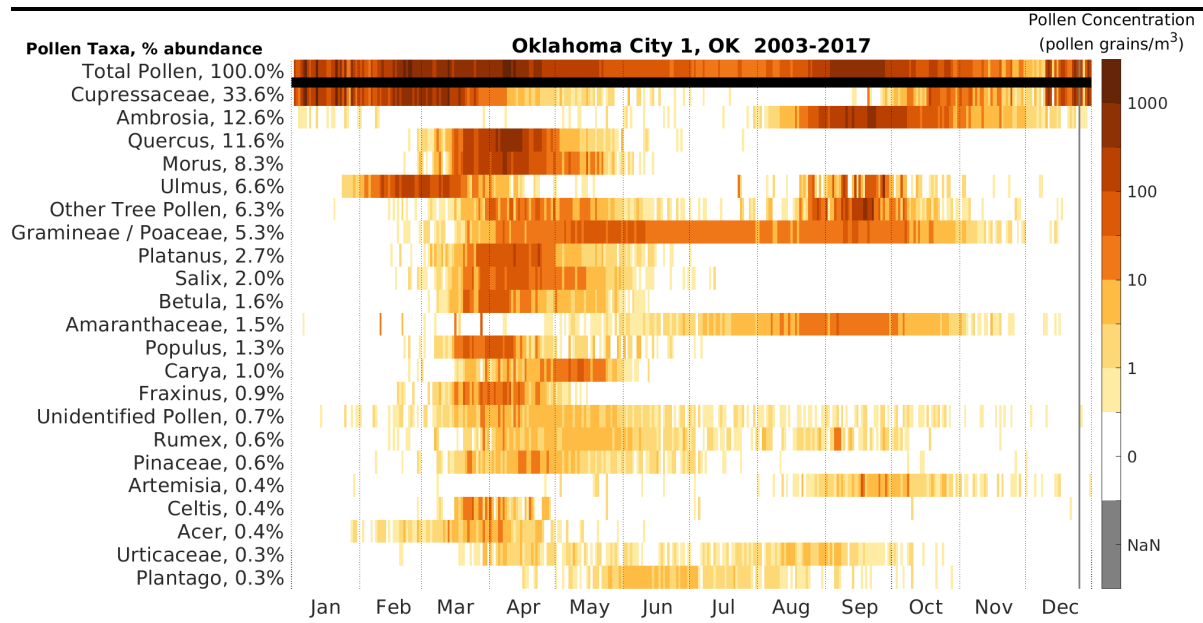

24

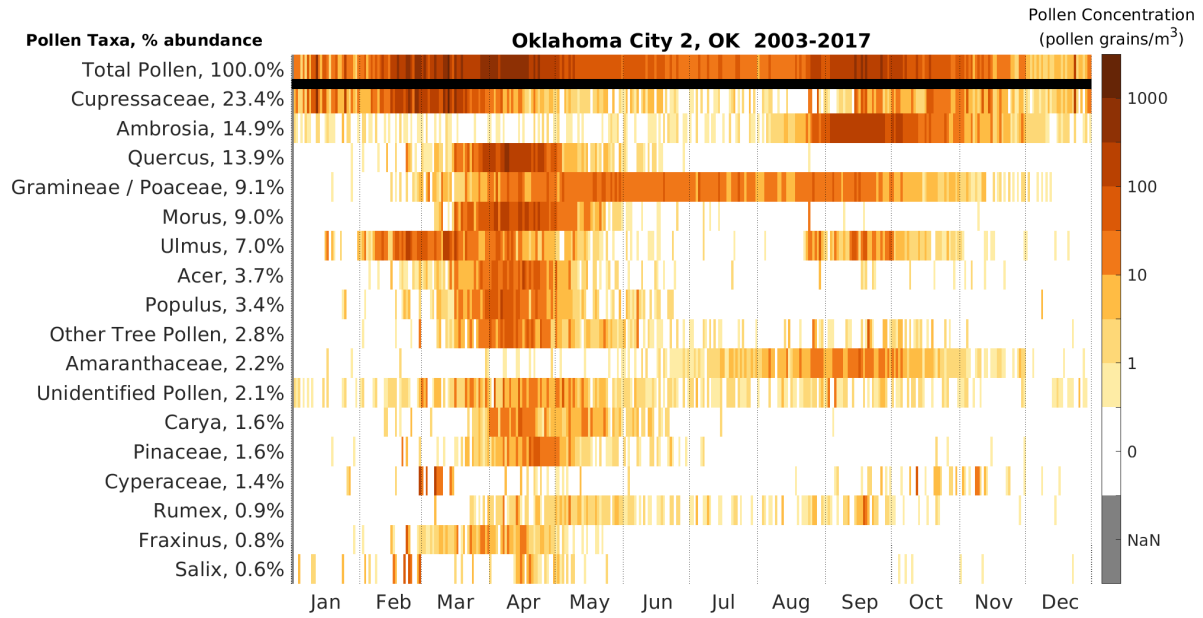

25

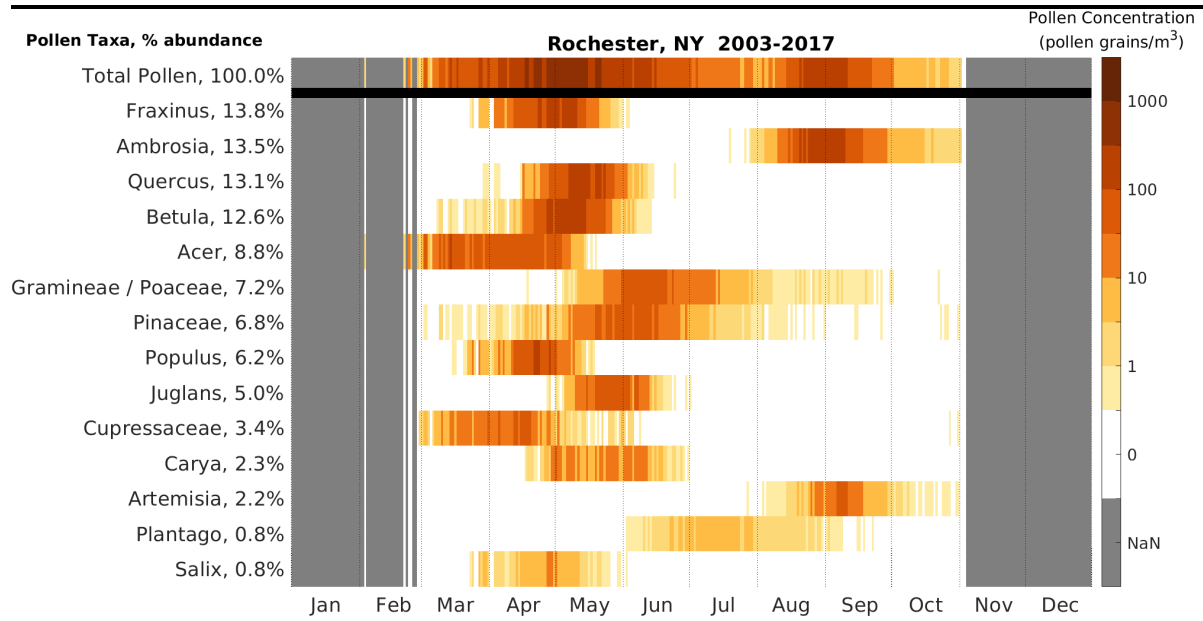

26

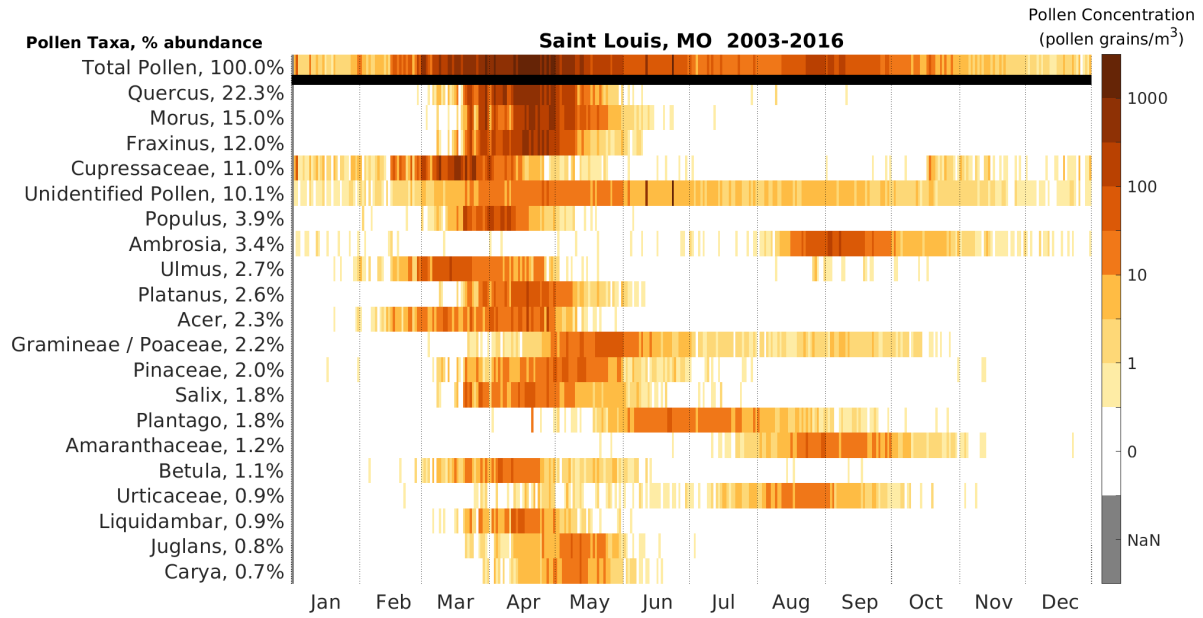

27

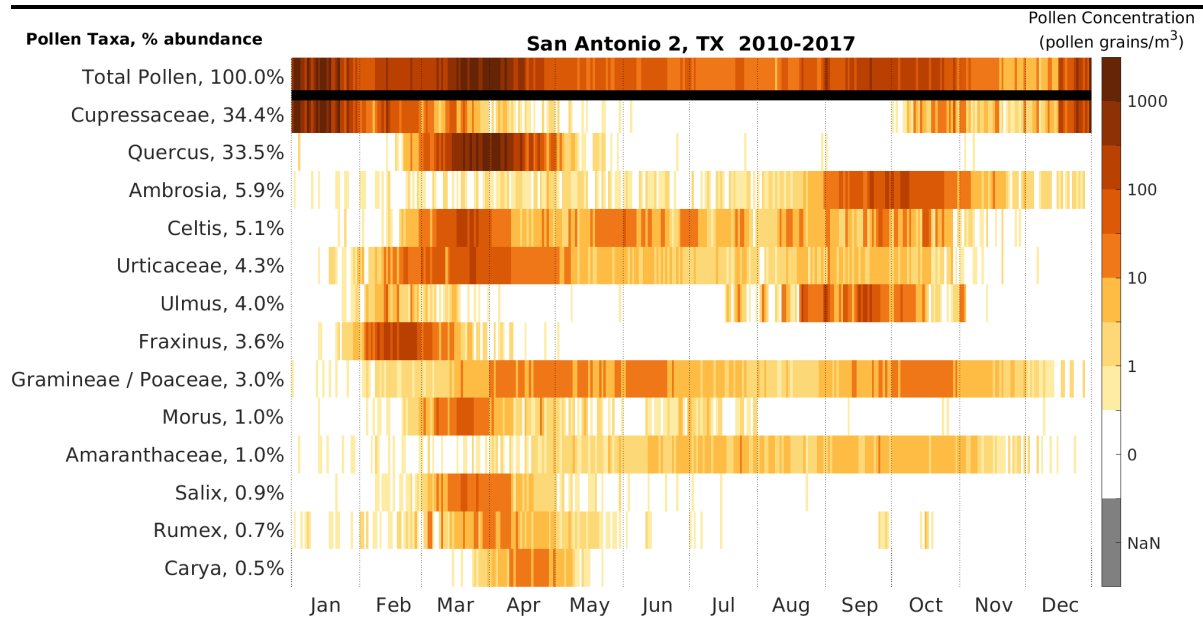

28

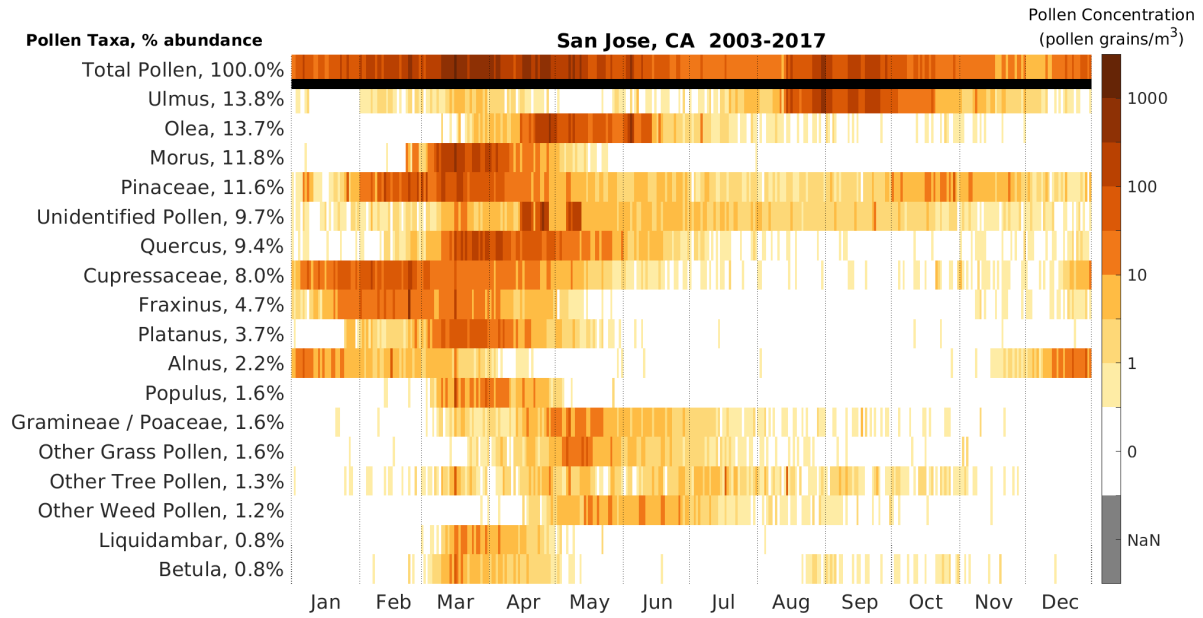

29

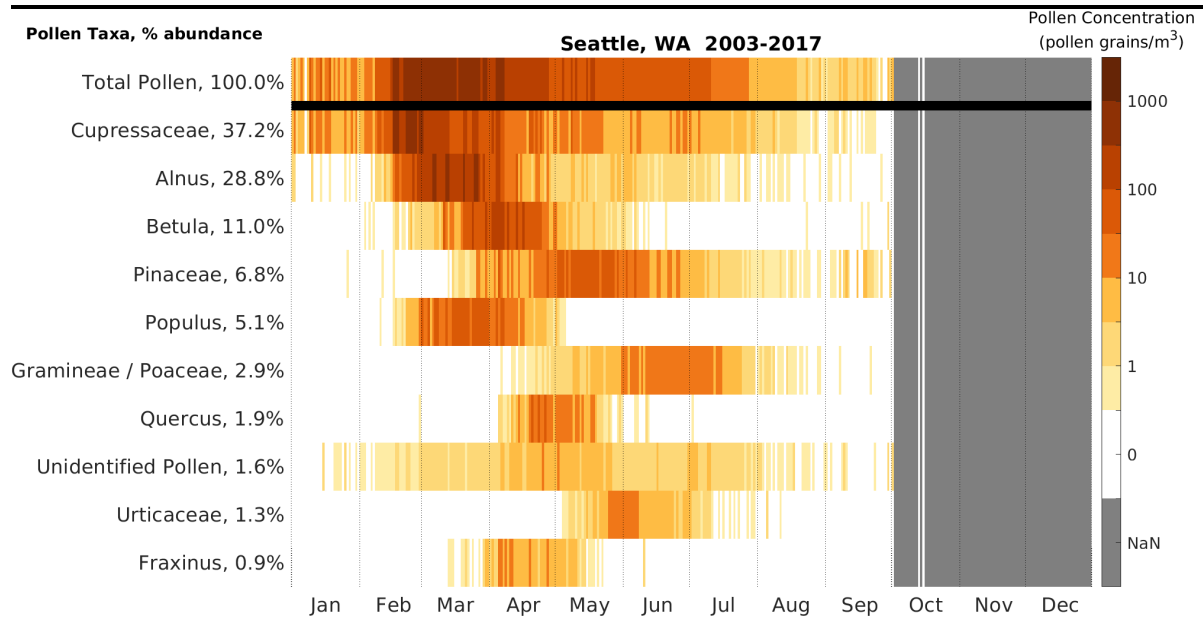

30



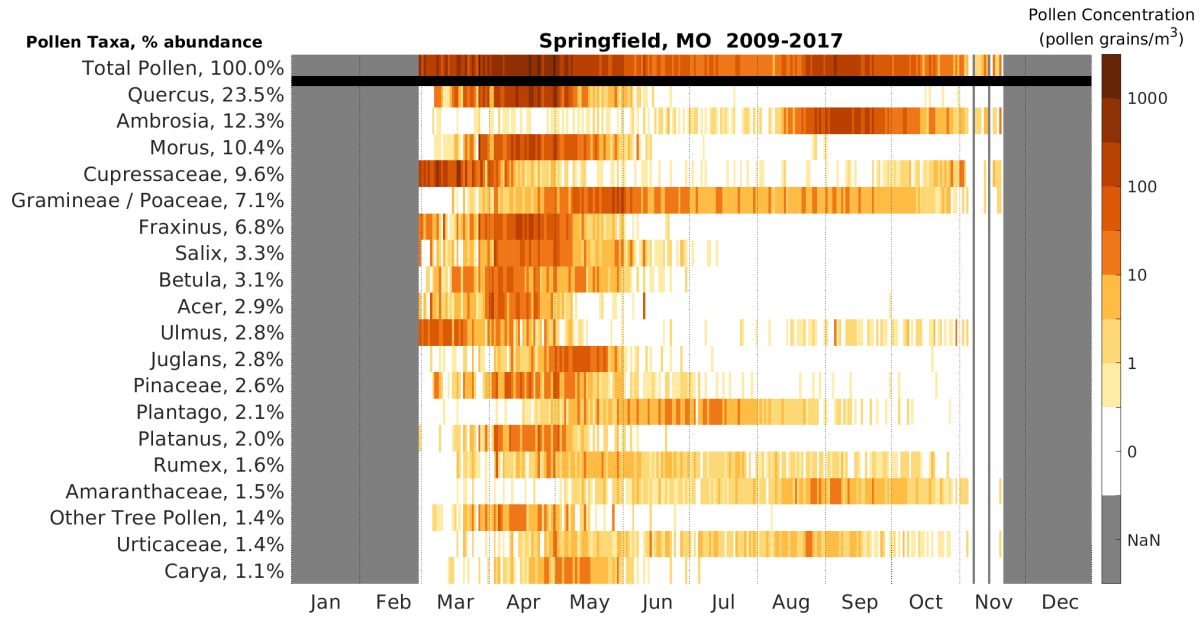

31

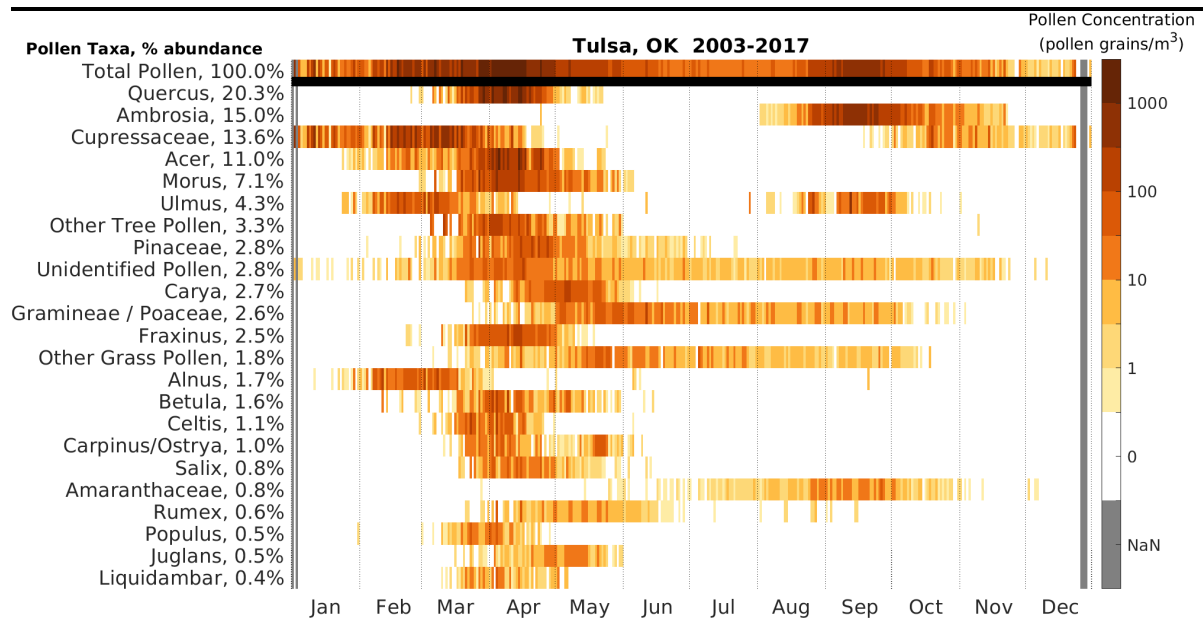

32

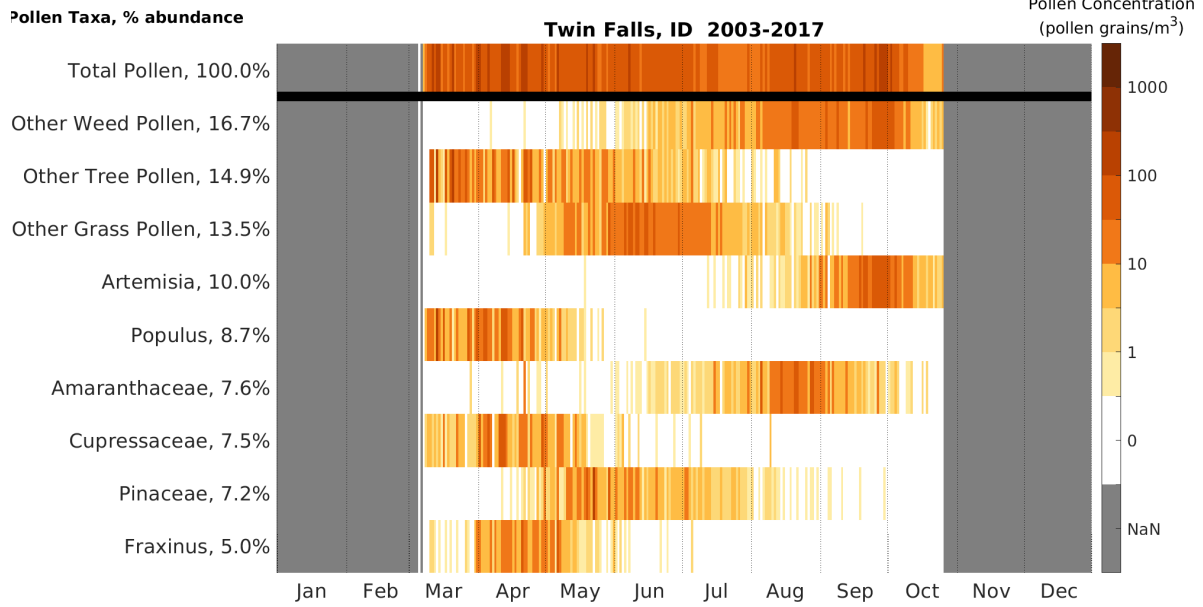

33

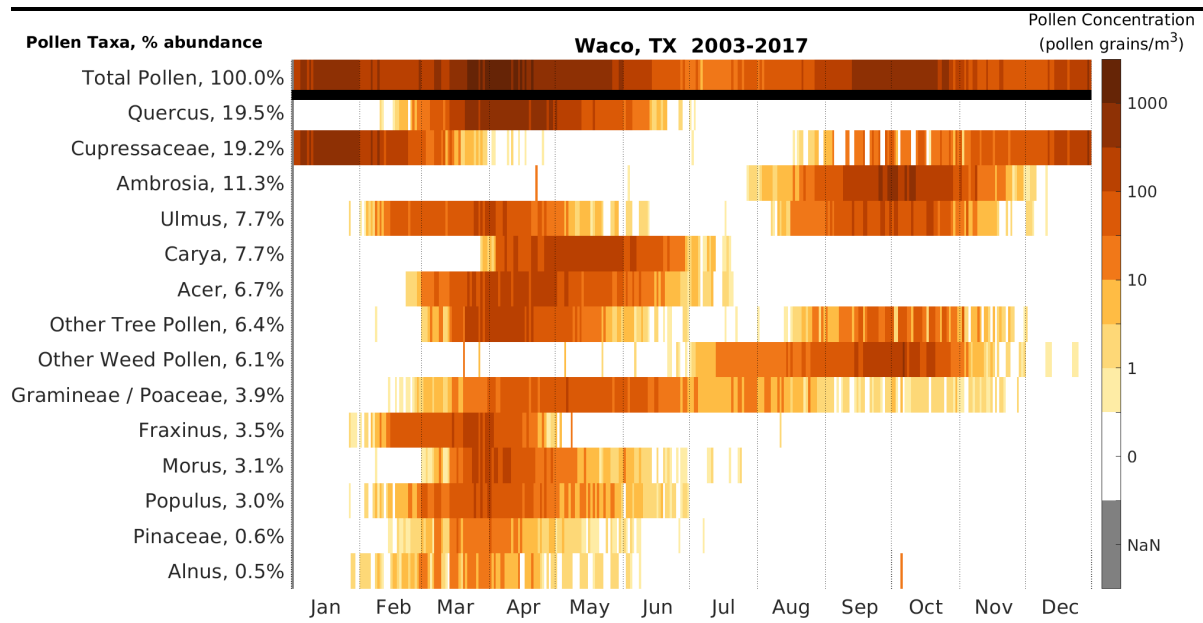

34

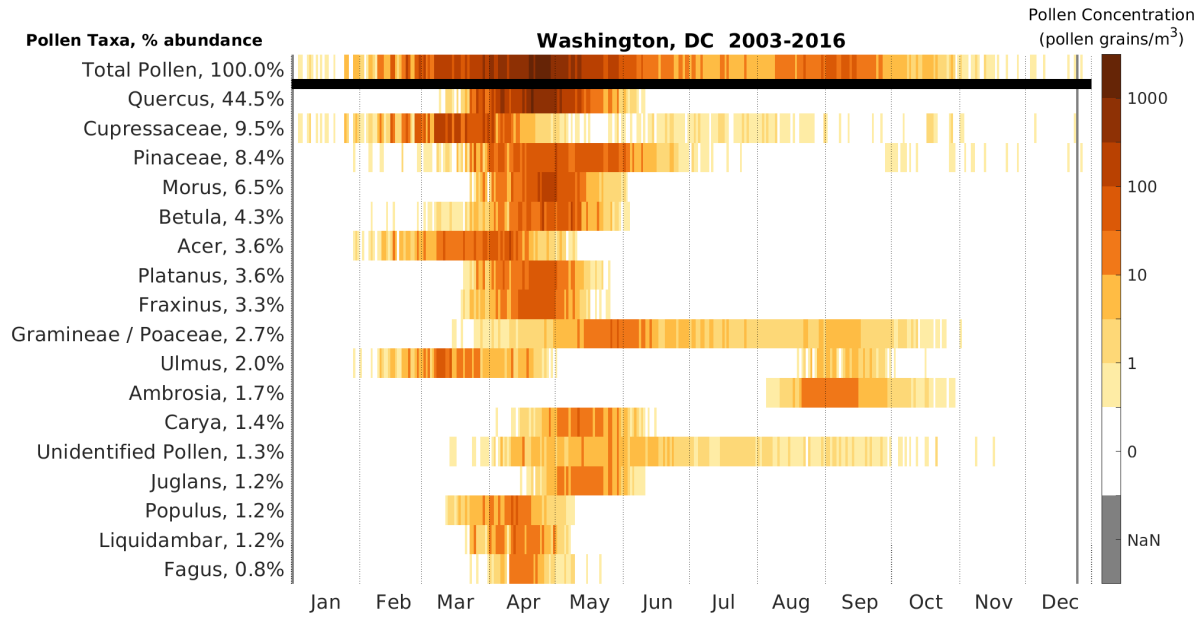

35

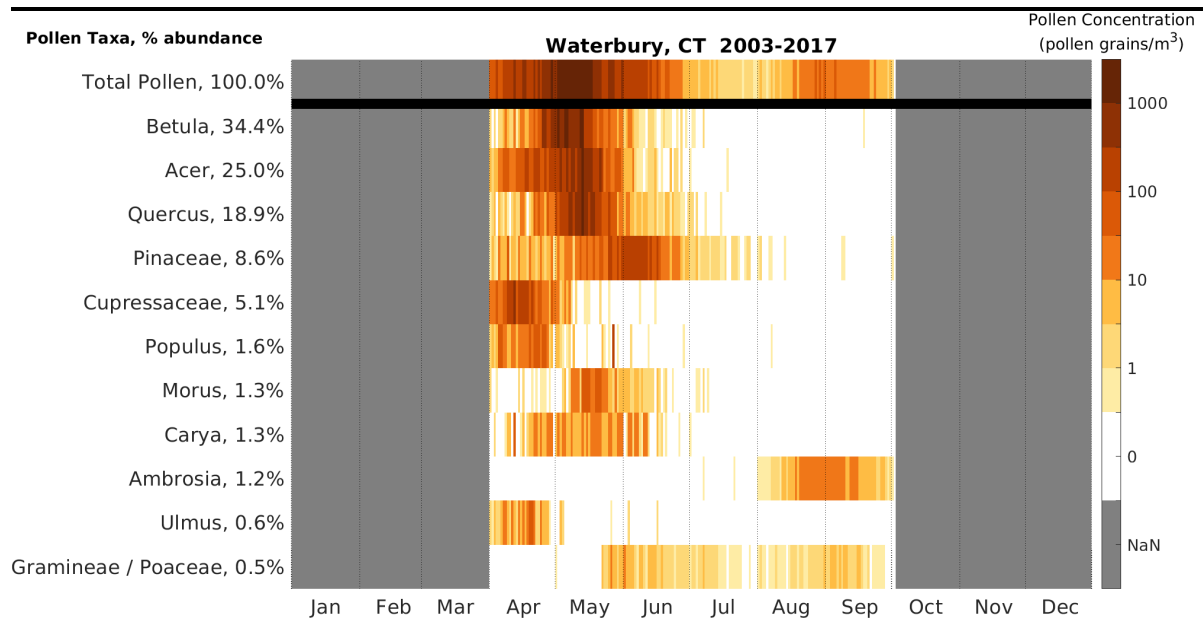

36

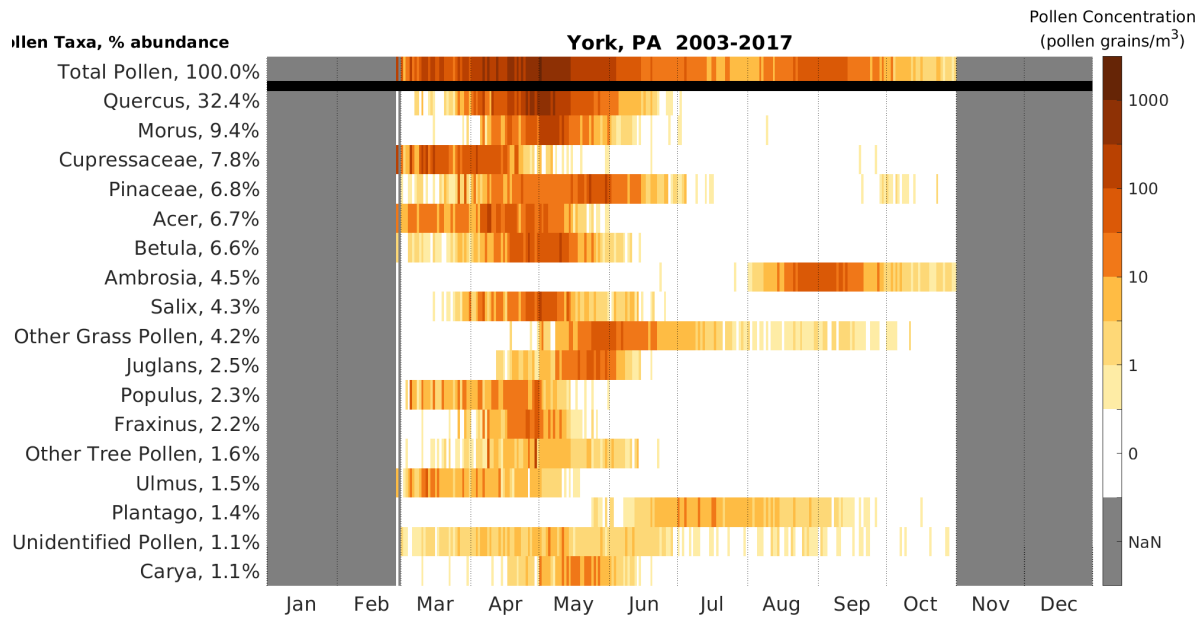

37

38

39  
 40  
 41  
 42  
 43  
 44  
 45  
 46  
 47

**Taxon-specific pollen calendars**

Pollen calendars for pollen taxon listed in title. Daily mean climatology of pollen concentration, 2003-2017. NAB stations are ordered by latitude. Missing data are shaded grey and denoted NaN in the colorbar.

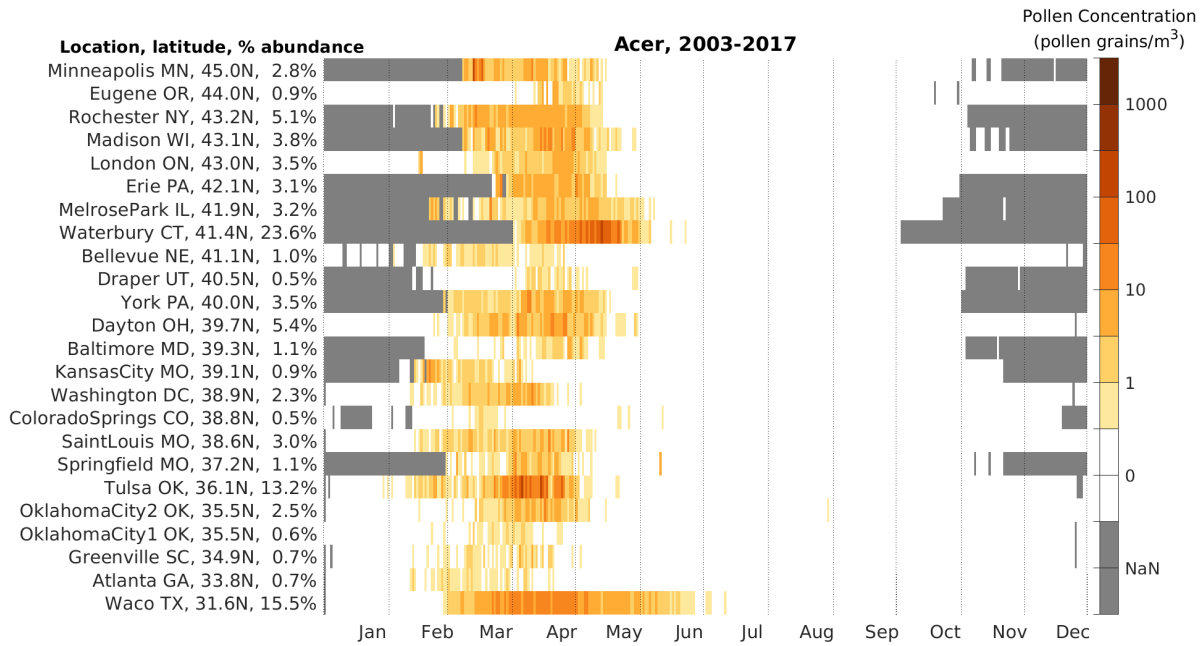

48

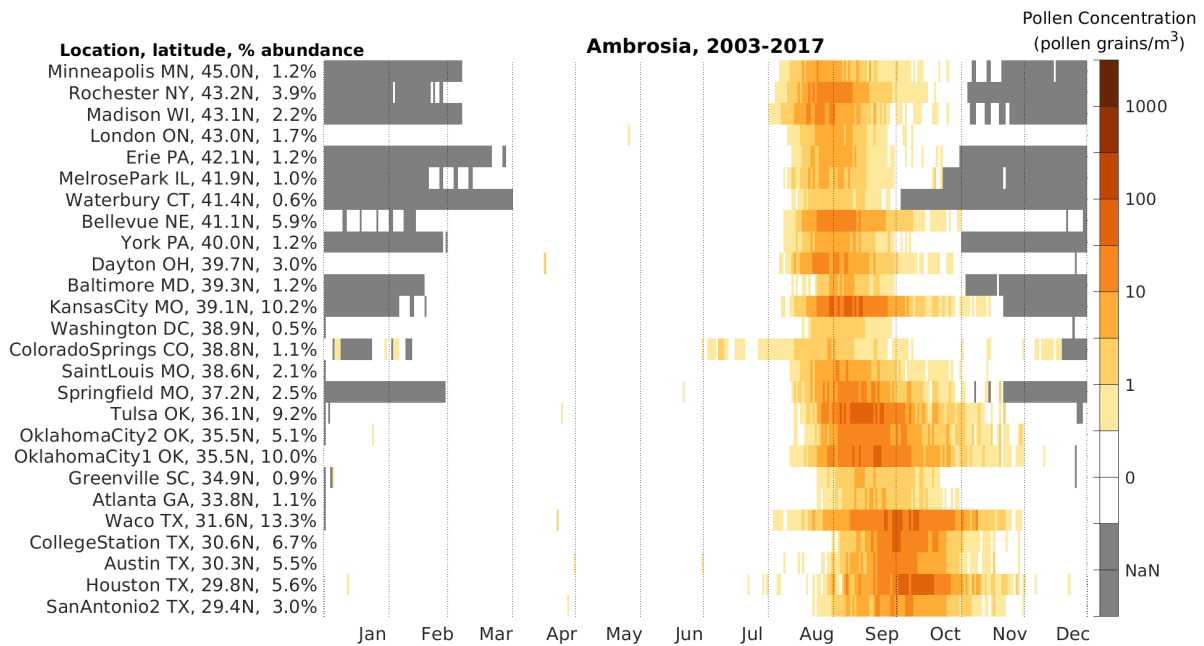

49

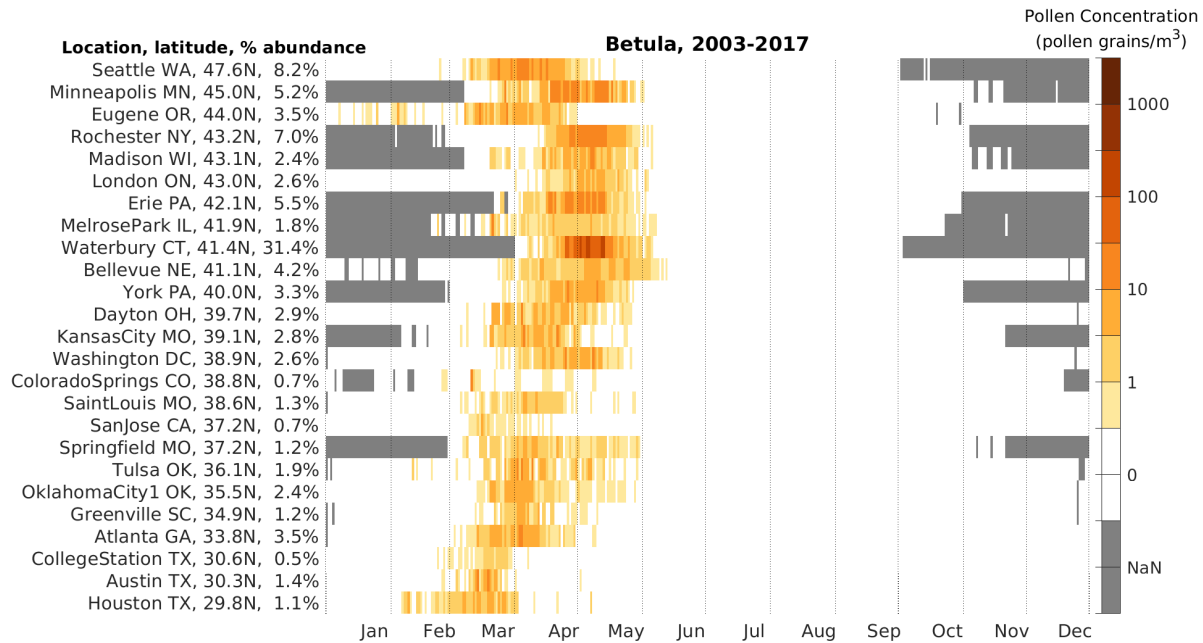

50

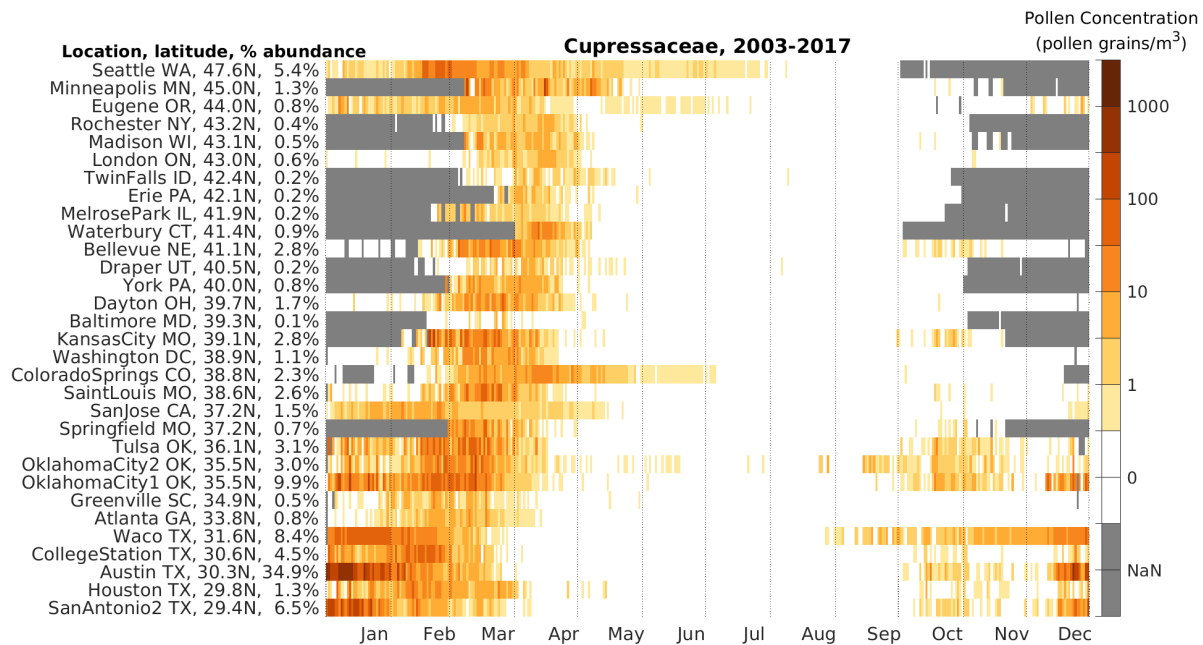

51

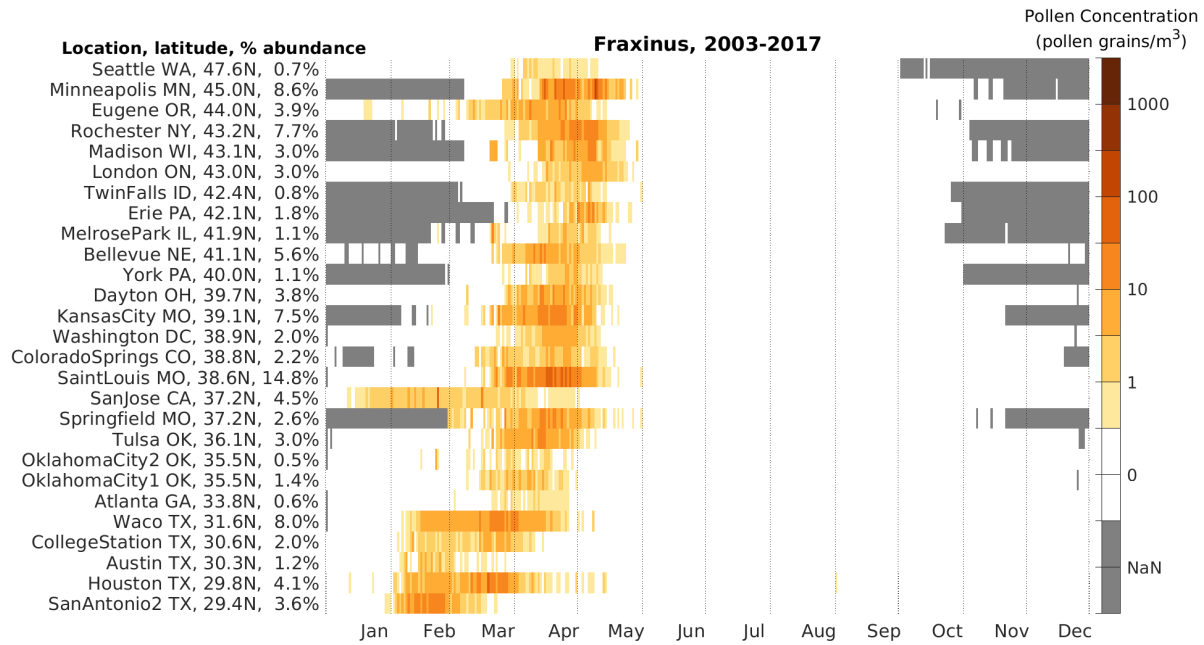

52

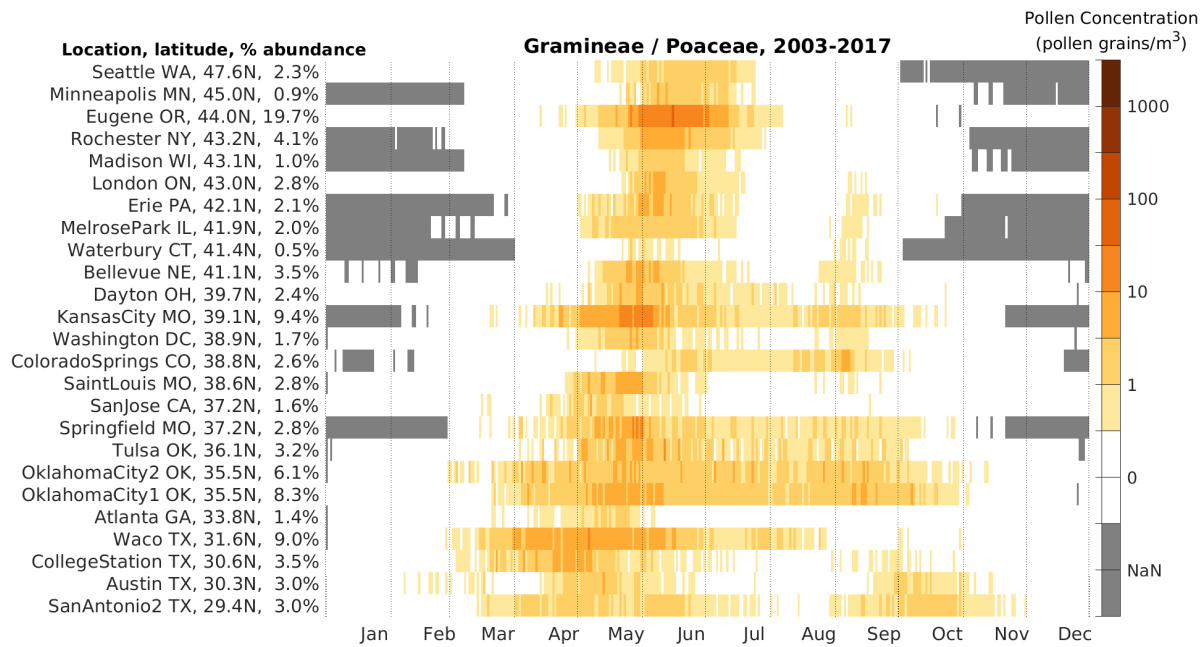

53

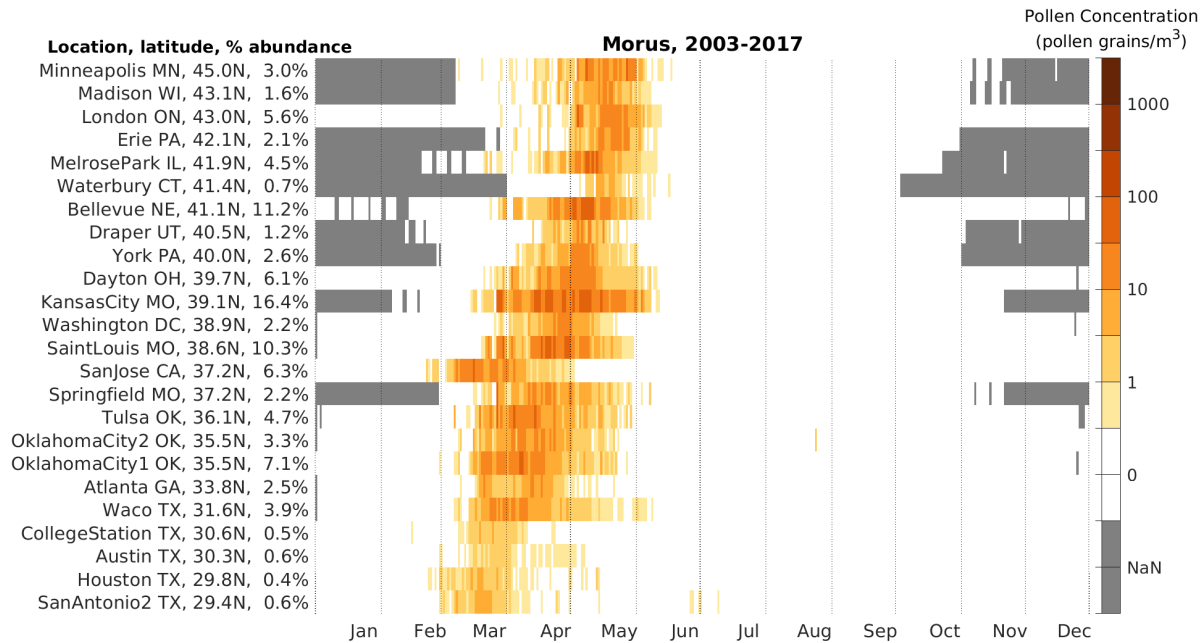

54

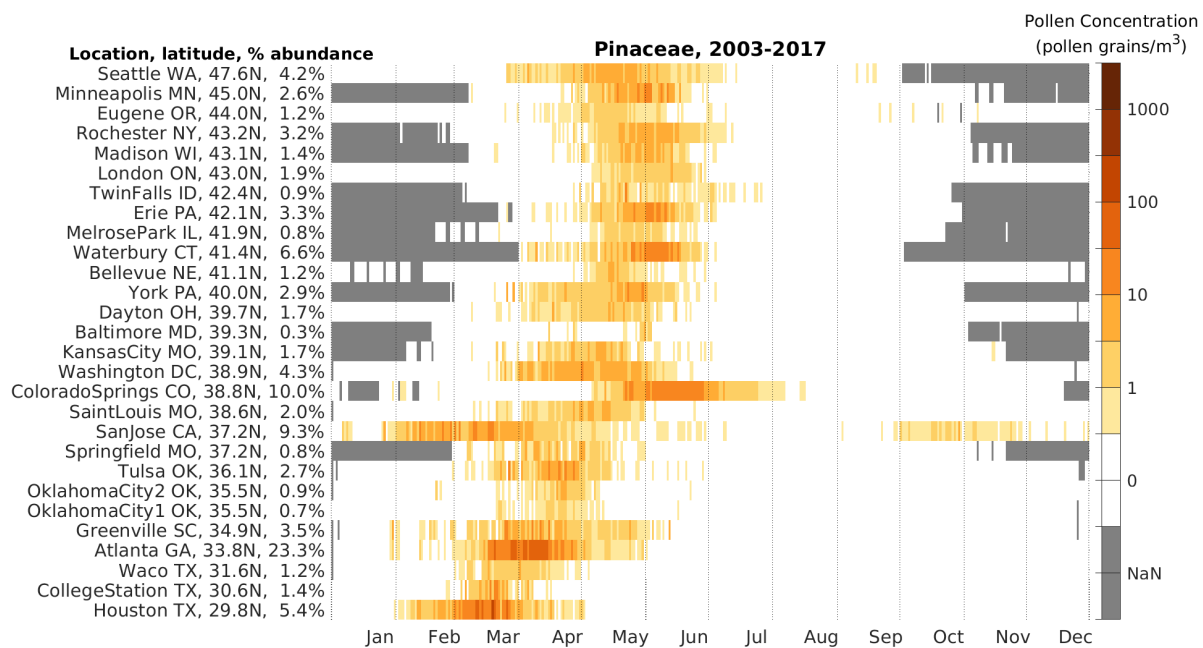

55



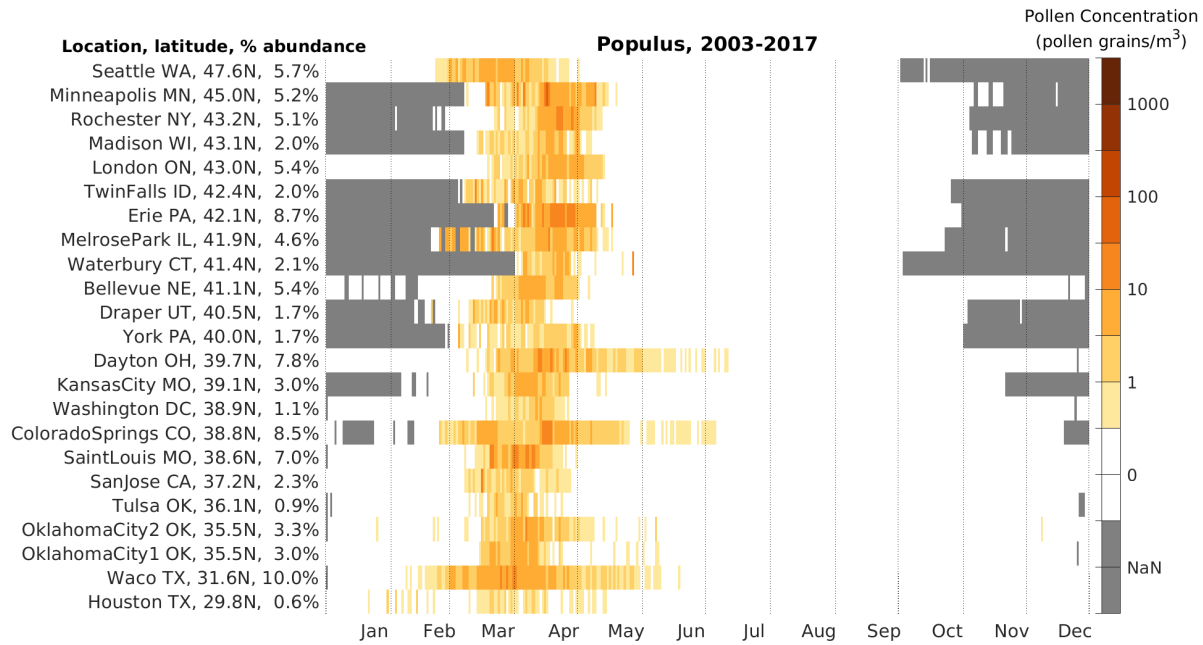

56

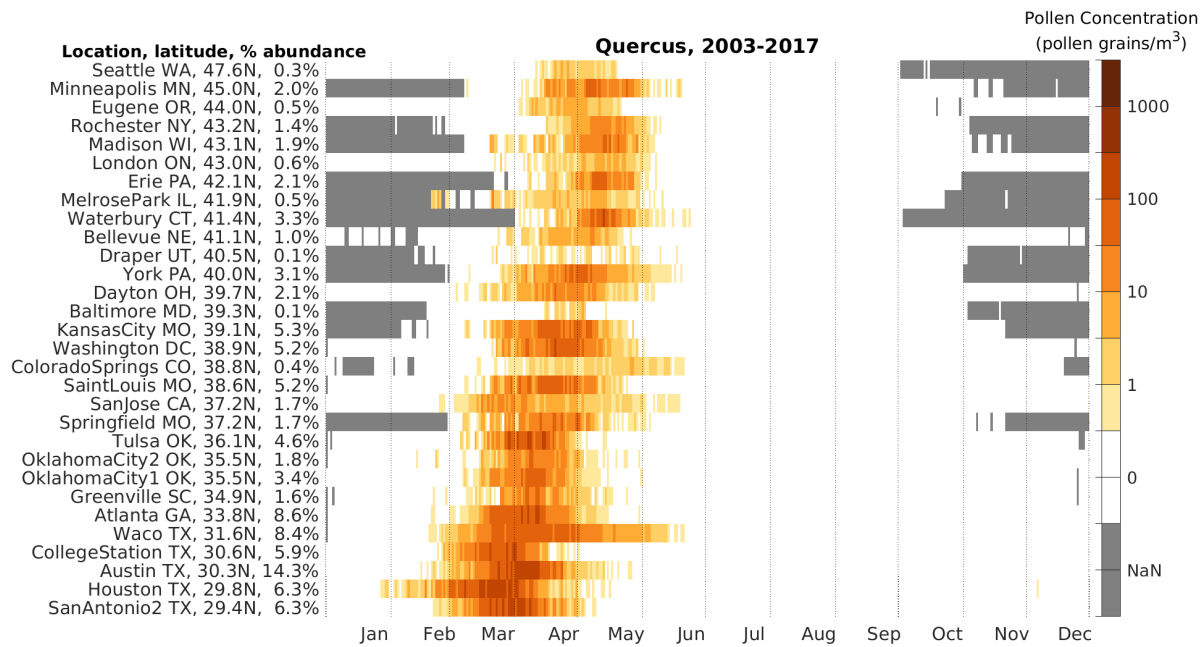

57

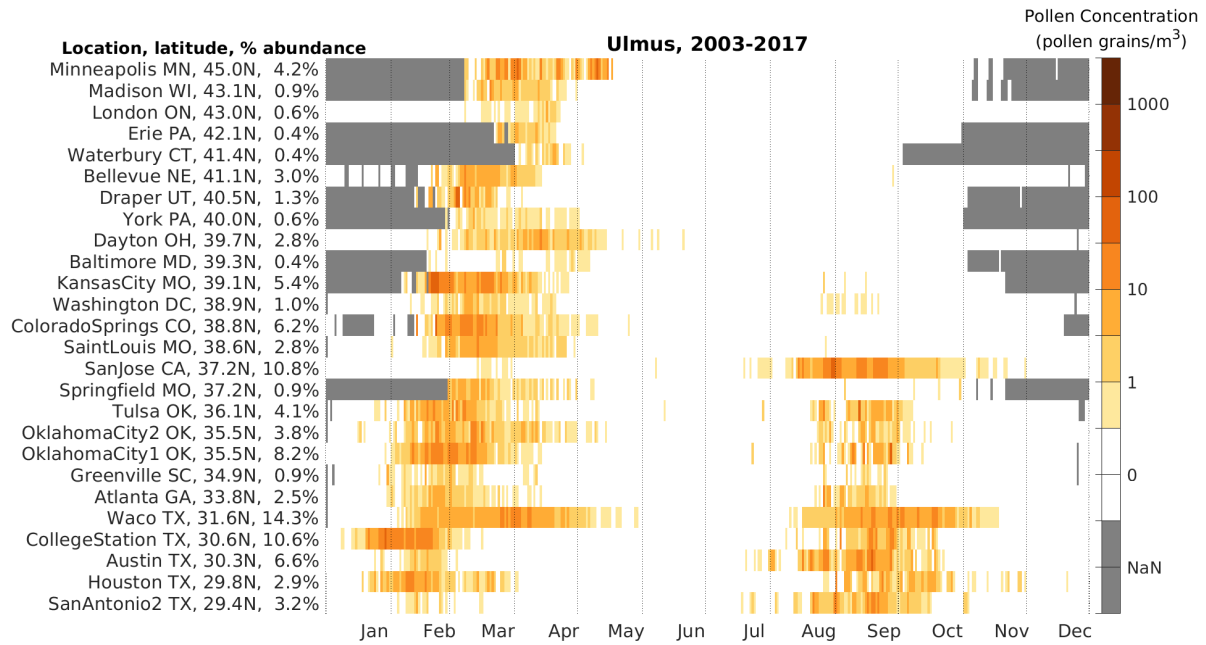

- 58
- 59
- 60
- 61
- 62
- 63
- 64
- 65
- 66
- 67
- 68
- 69
- 70
- 71
- 72
- 73
- 74
- 75
- 76
- 77
- 78
- 79
- 80
- 81
- 82
- 83
- 84

85 **Radar Charts**

86

87 Radar charts for the station at the city and state or province listed in title of figure. Percent total  
88 API for the station for the 11 allergenic pollen taxa and the combined category of "Other" which  
89 is sum of all the other sampled allergenic pollen taxa.

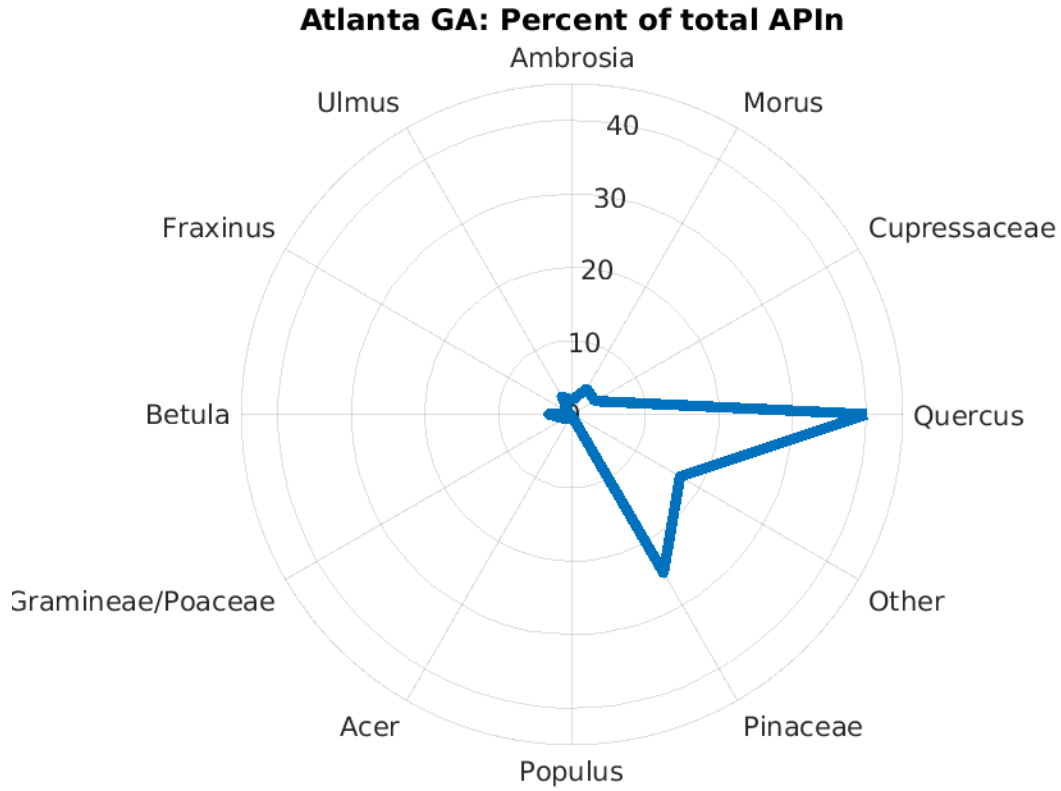

90

**Austin TX: Percent of total APIn**

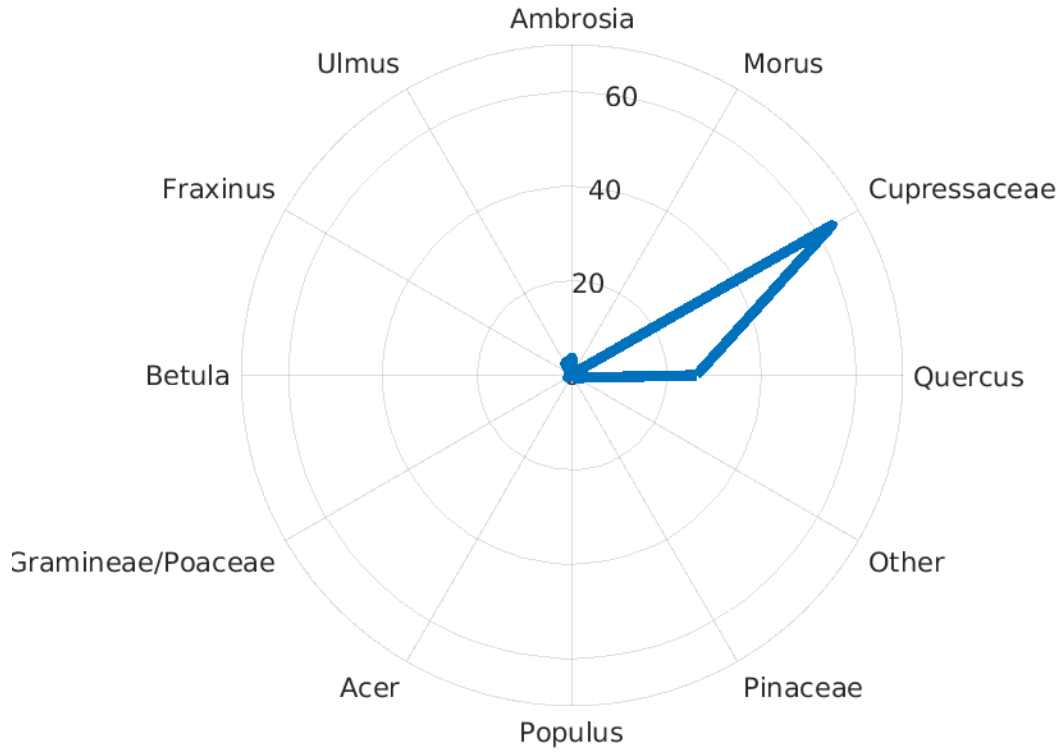

91

**Baltimore MD: Percent of total APIn**

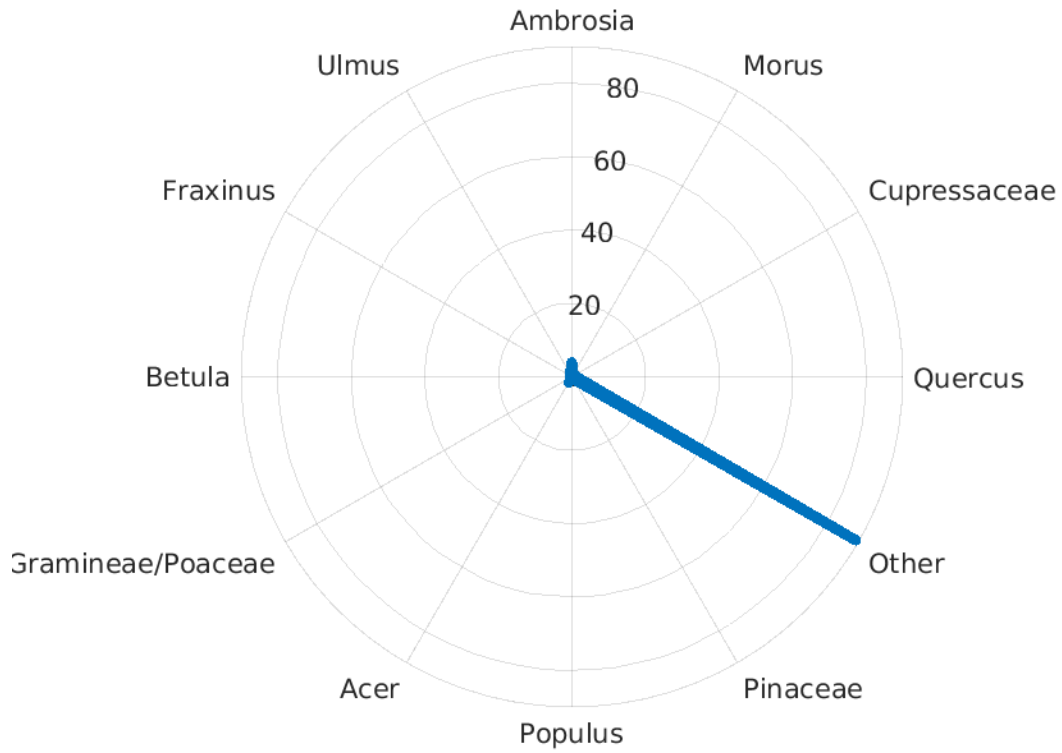

92

**Bellevue NE: Percent of total APIn**

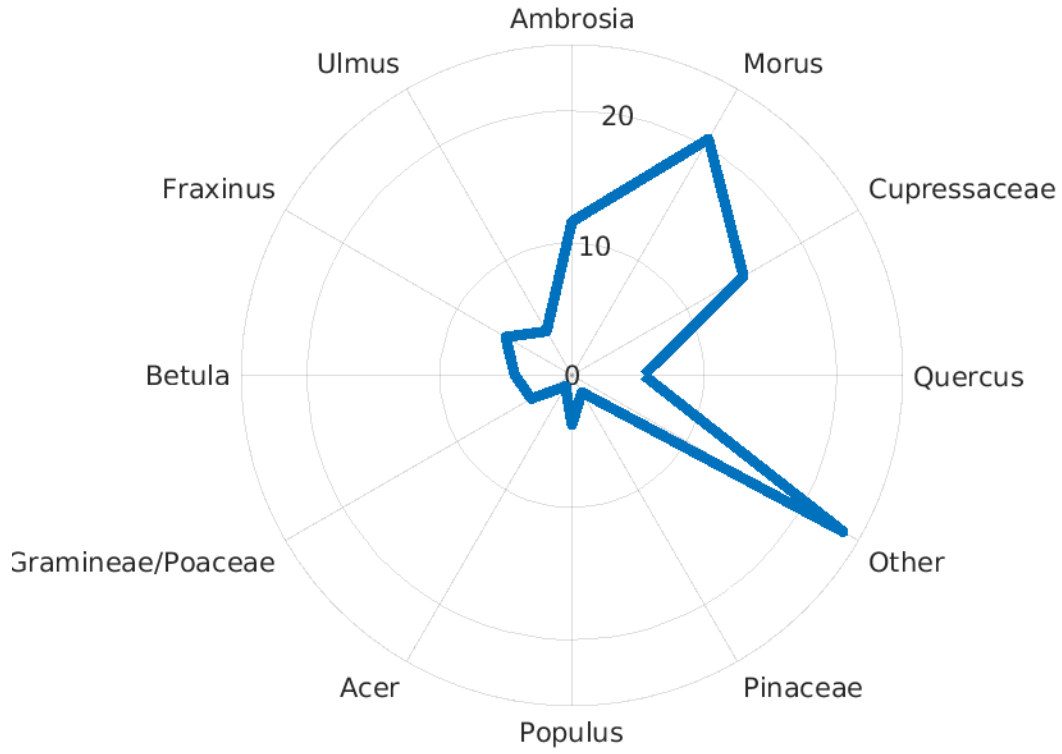

93

**College Station TX: Percent of total APIn**

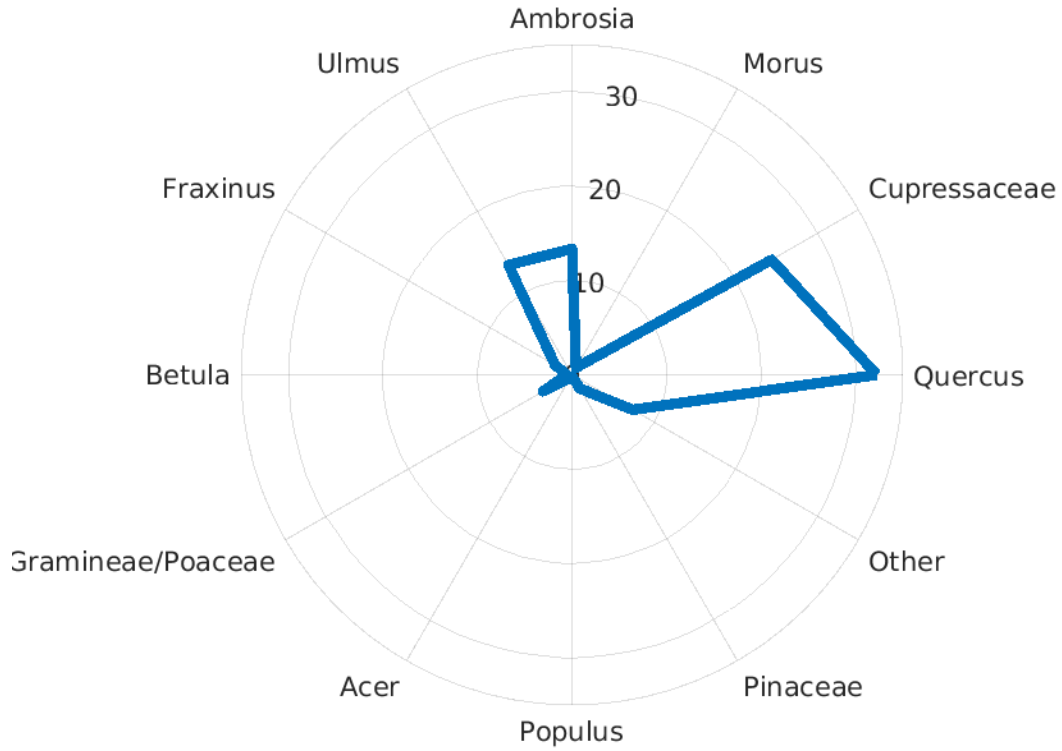

94

**Colorado Springs CO: Percent of total APIn**

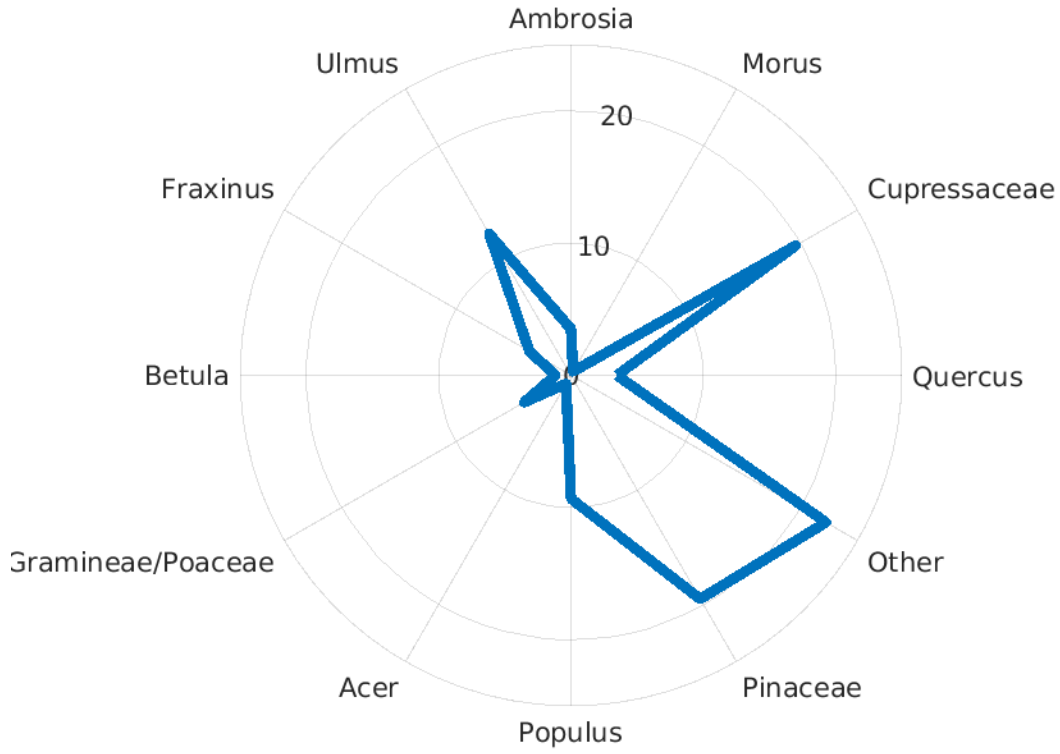

95

**Dayton OH: Percent of total APIn**

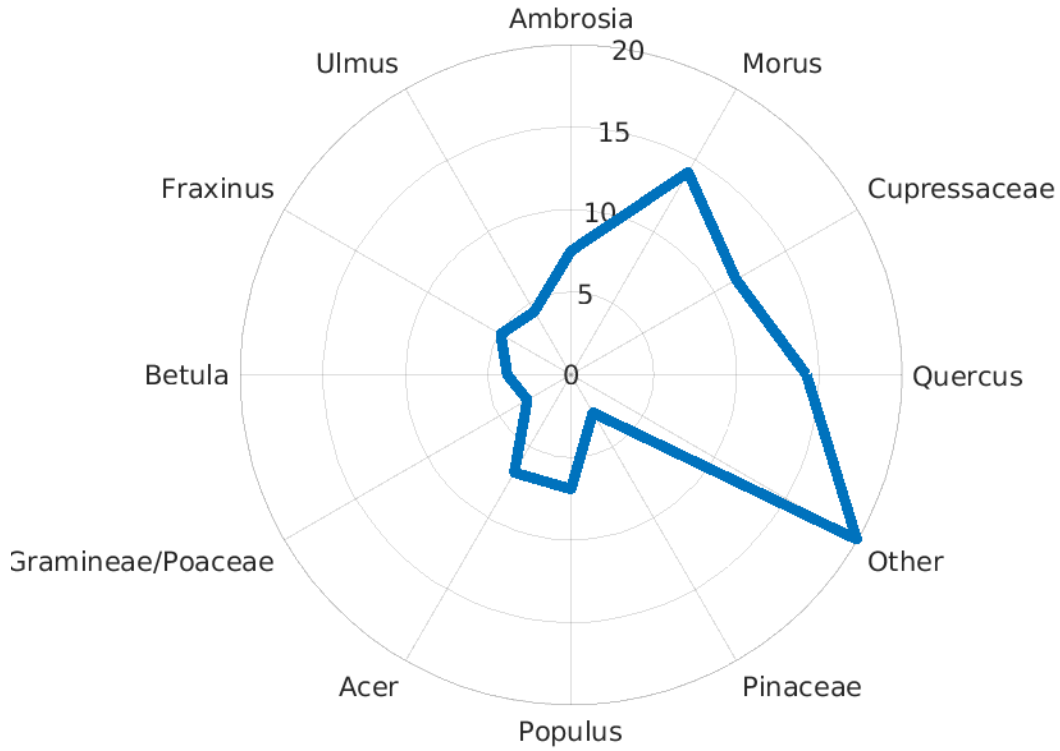

96

**Draper UT: Percent of total APIn**

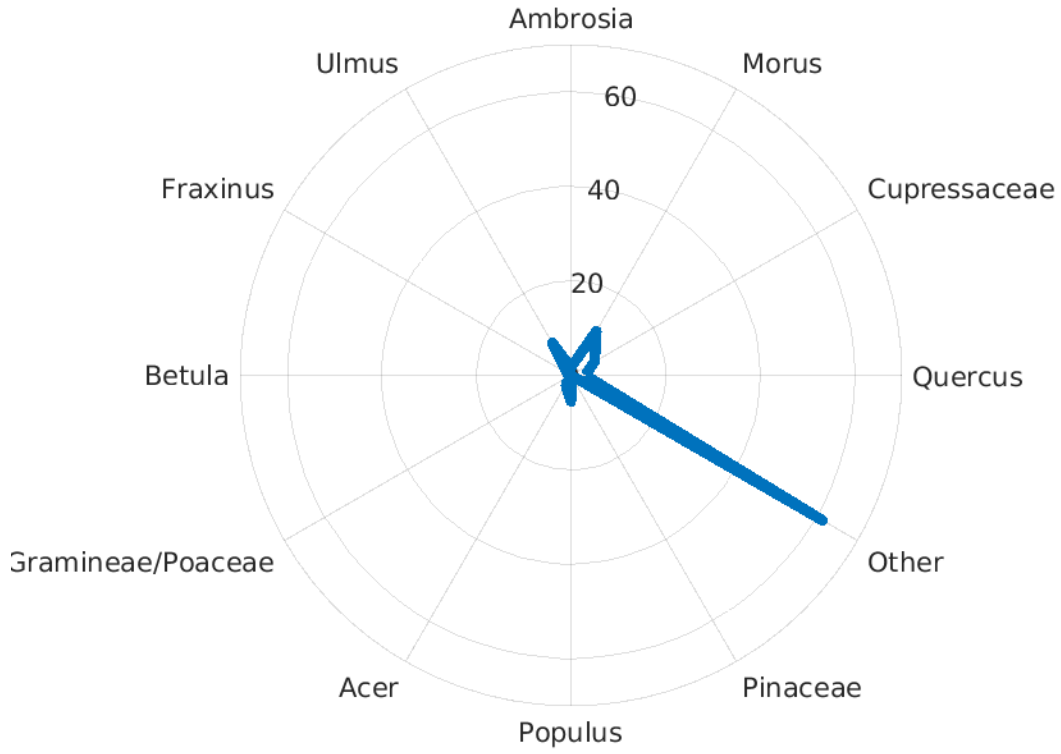

97

**Erie PA: Percent of total APIn**

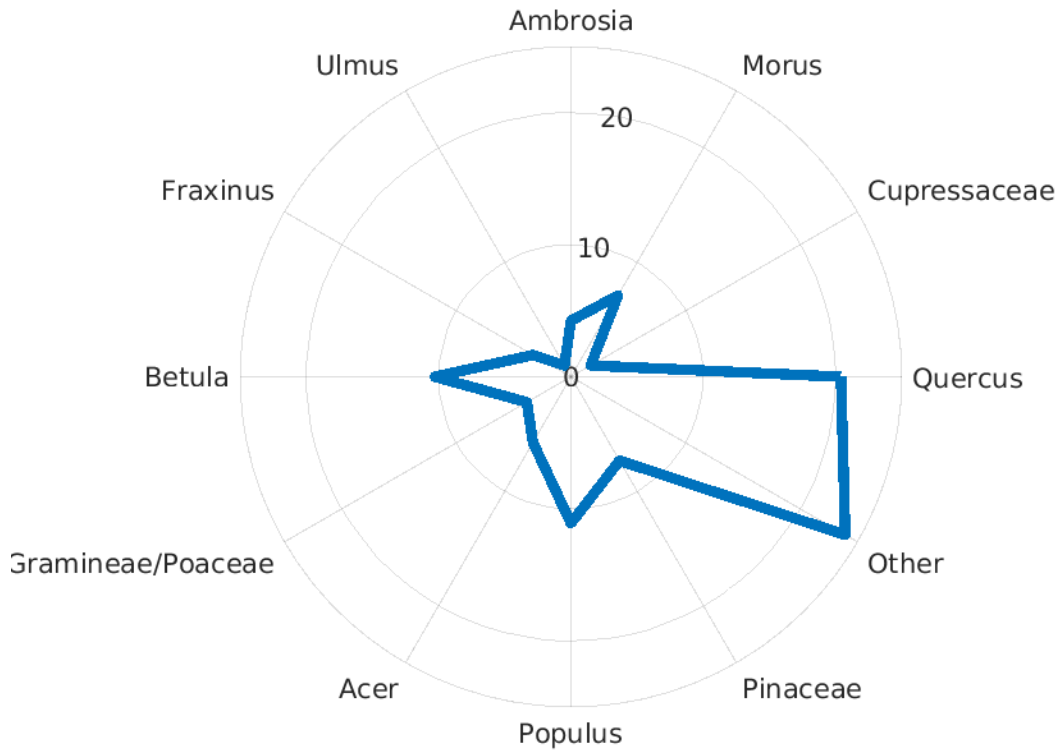

98

### Eugene OR: Percent of total APIn

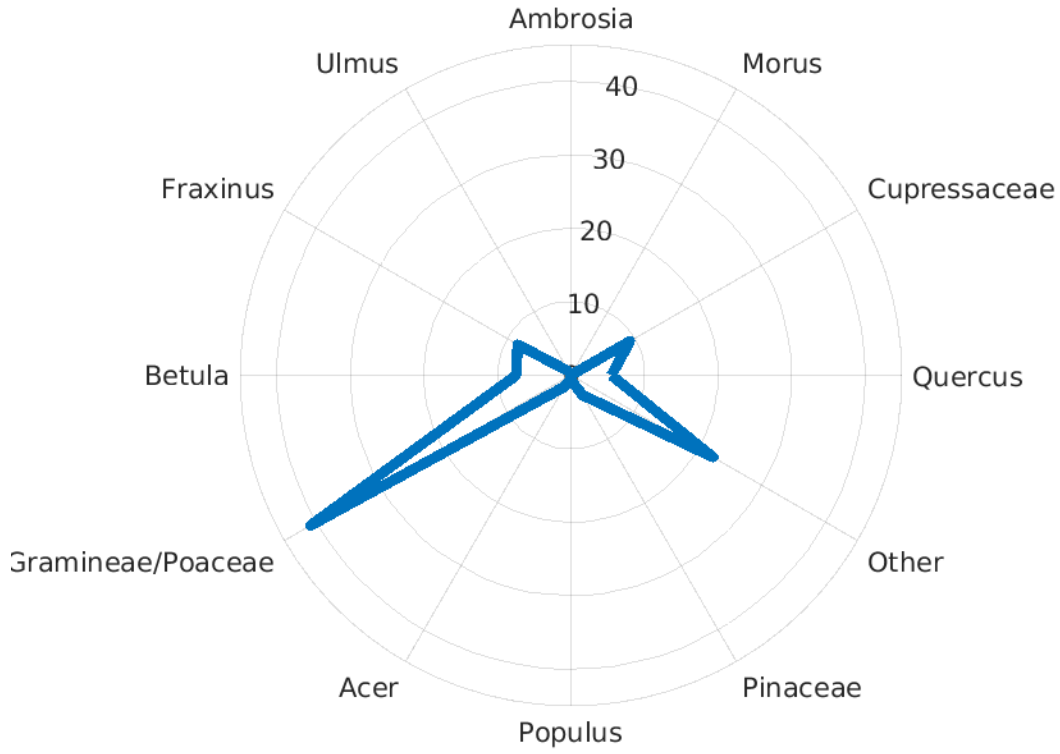

99

### Greenville SC: Percent of total APIn

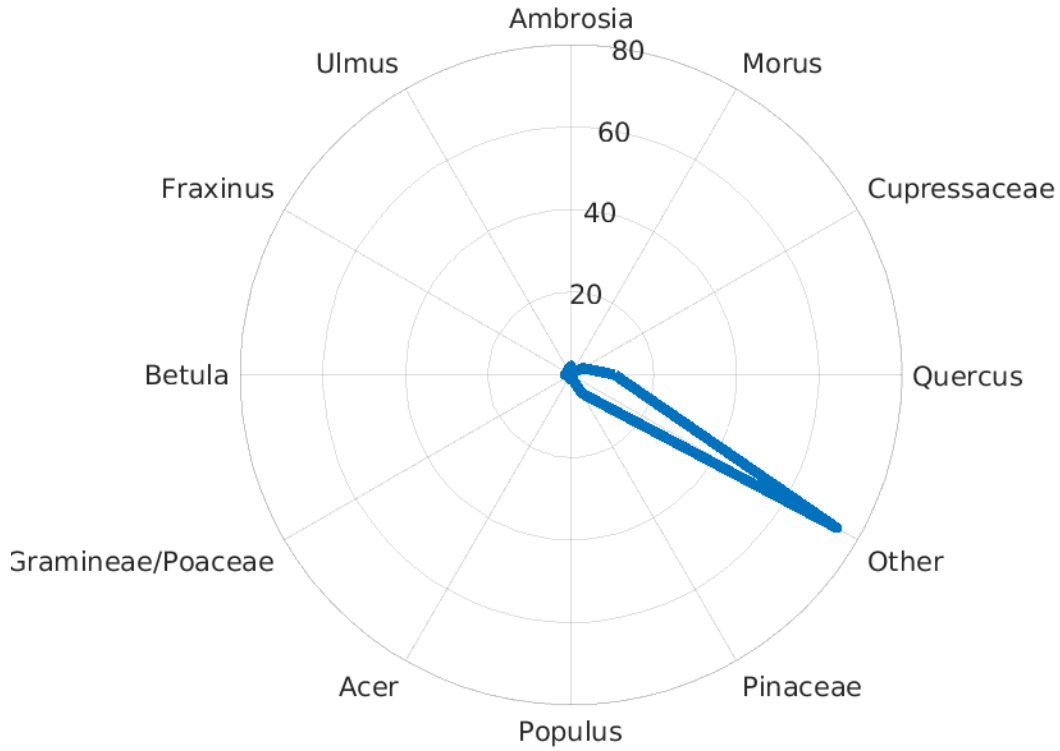

100



**Houston TX: Percent of total APIn**

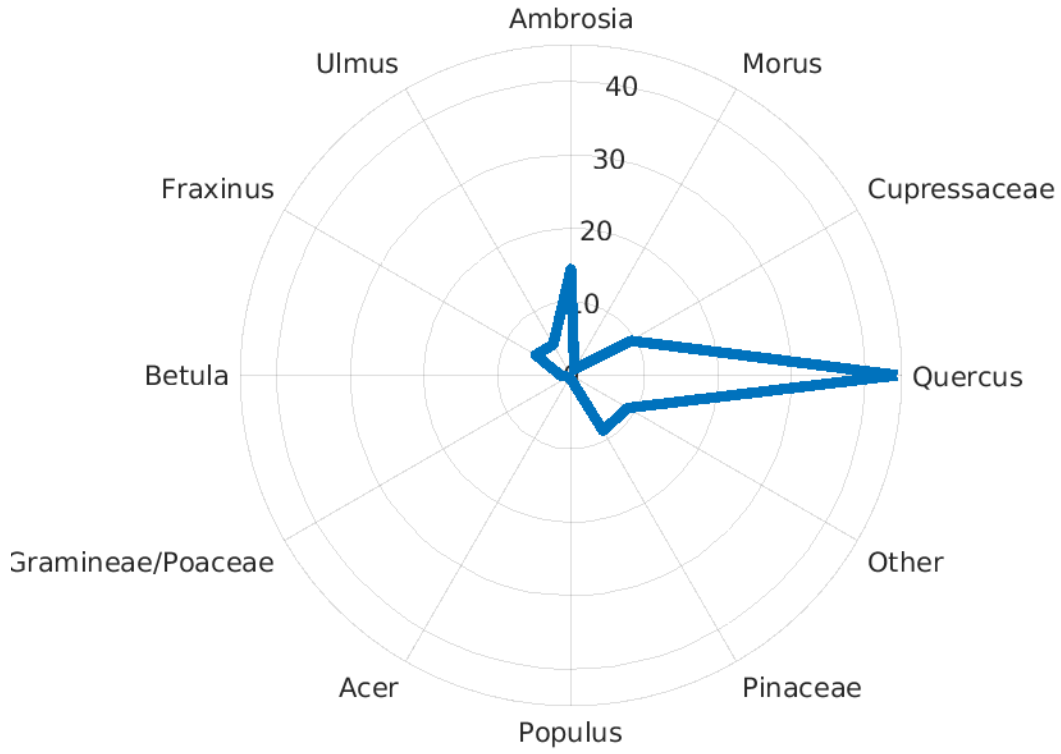

101

**Kansas City MO: Percent of total APIn**

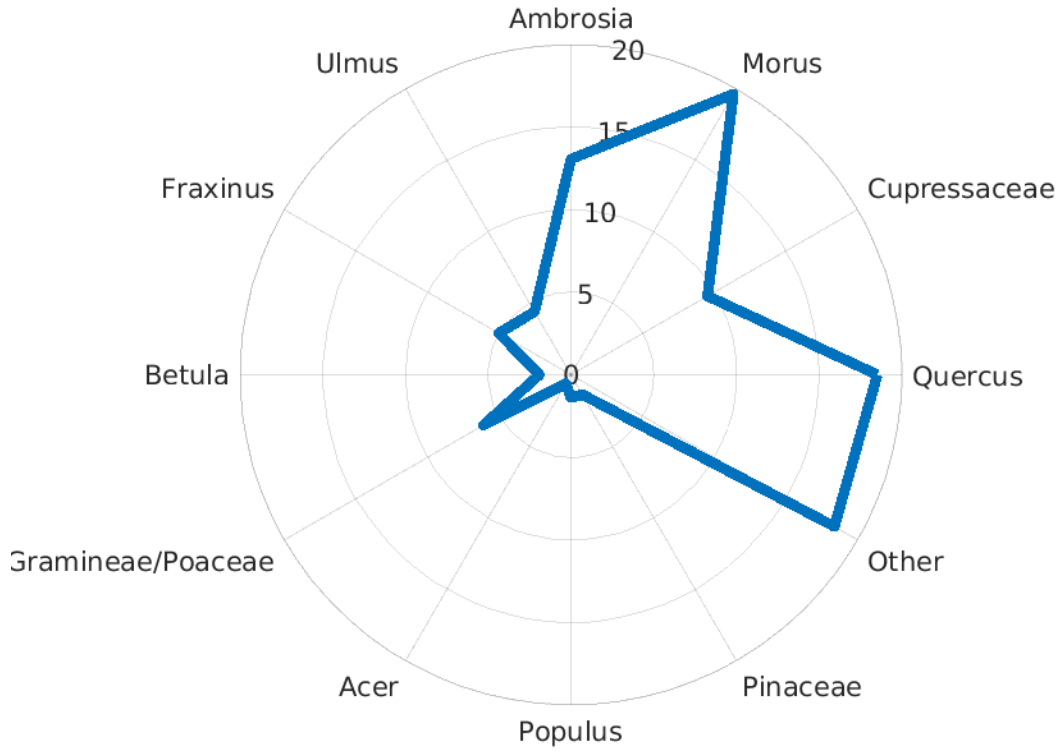

102

**London ON: Percent of total APIn**

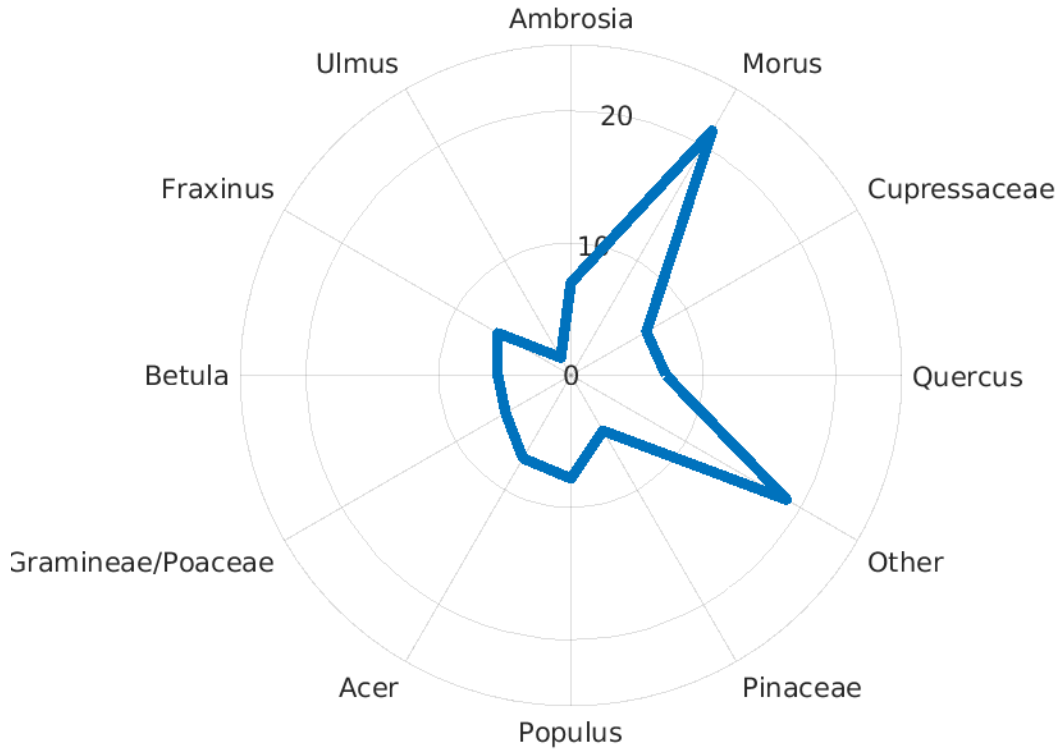

103

**Madison WI: Percent of total APIn**

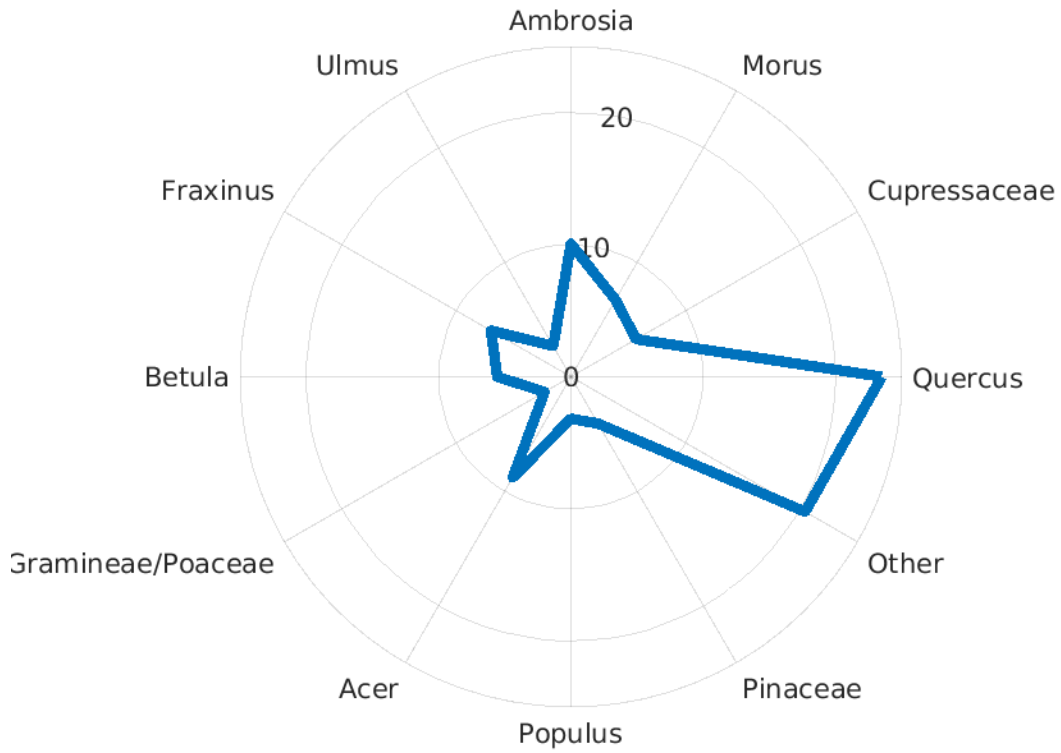

104

**Melrose Park IL: Percent of total APIn**

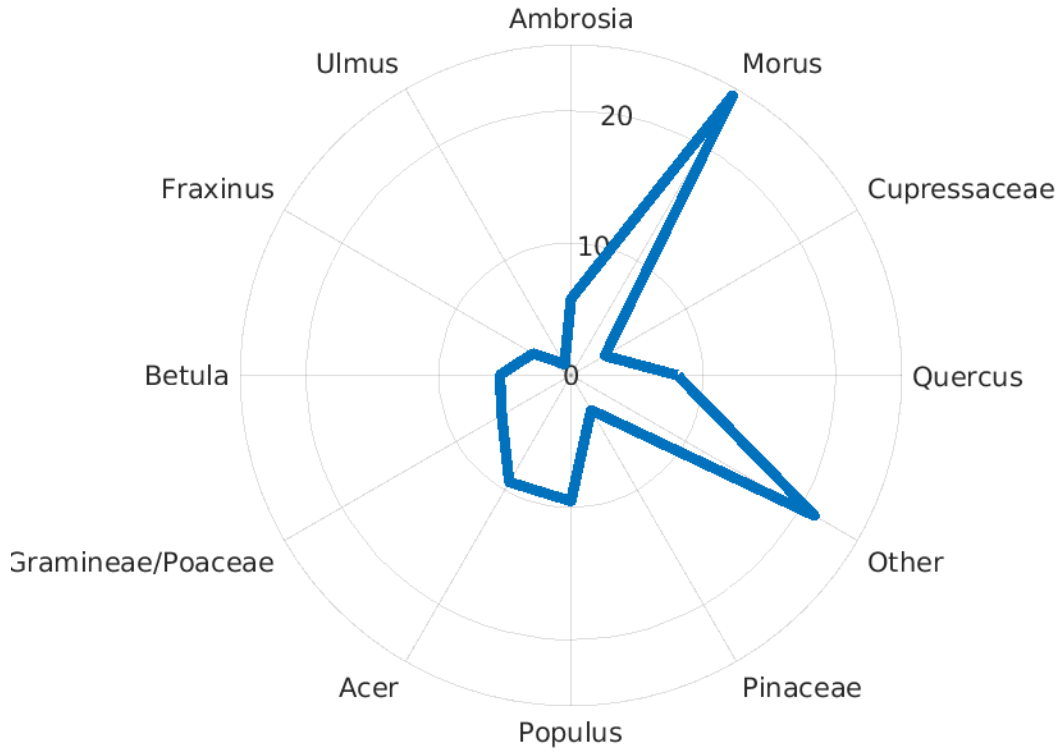

105

**Minneapolis MN: Percent of total APIn**

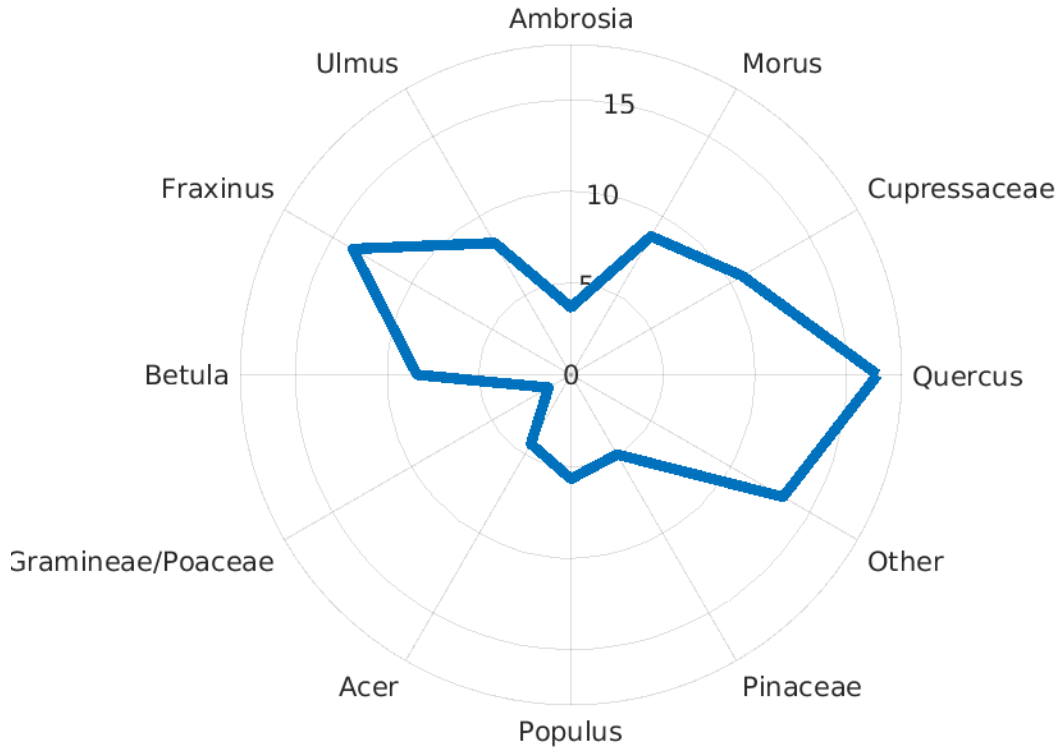

106

**Oklahoma City OK: Percent of total APIn**

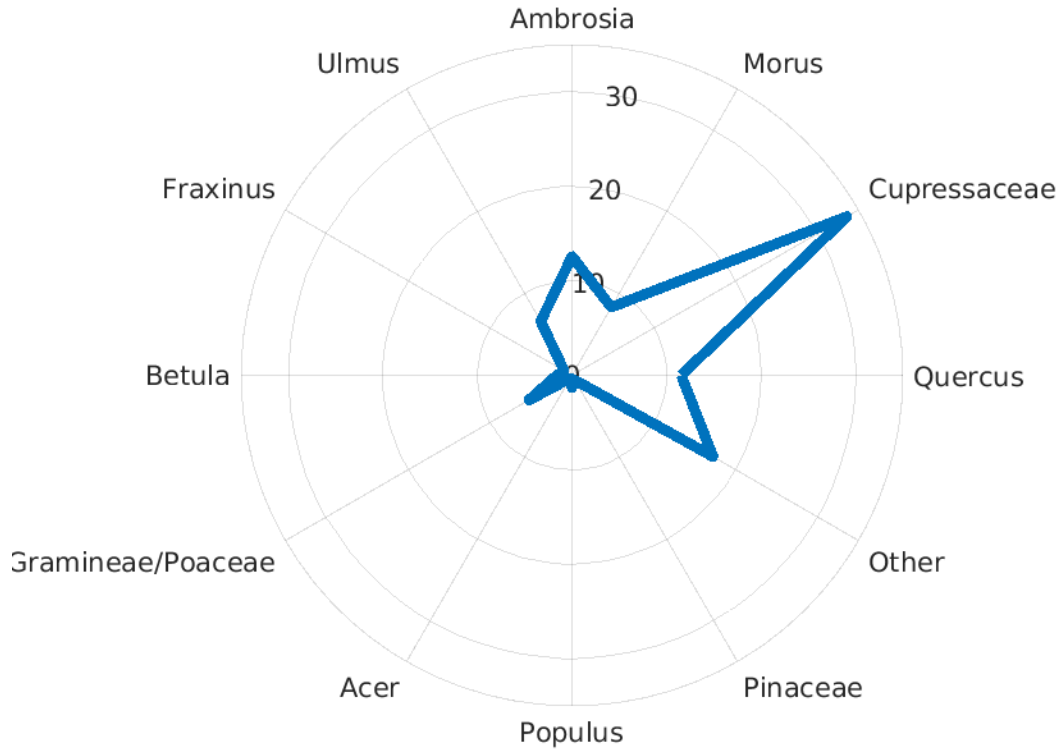

107

**Oklahoma City OK: Percent of total APIn**

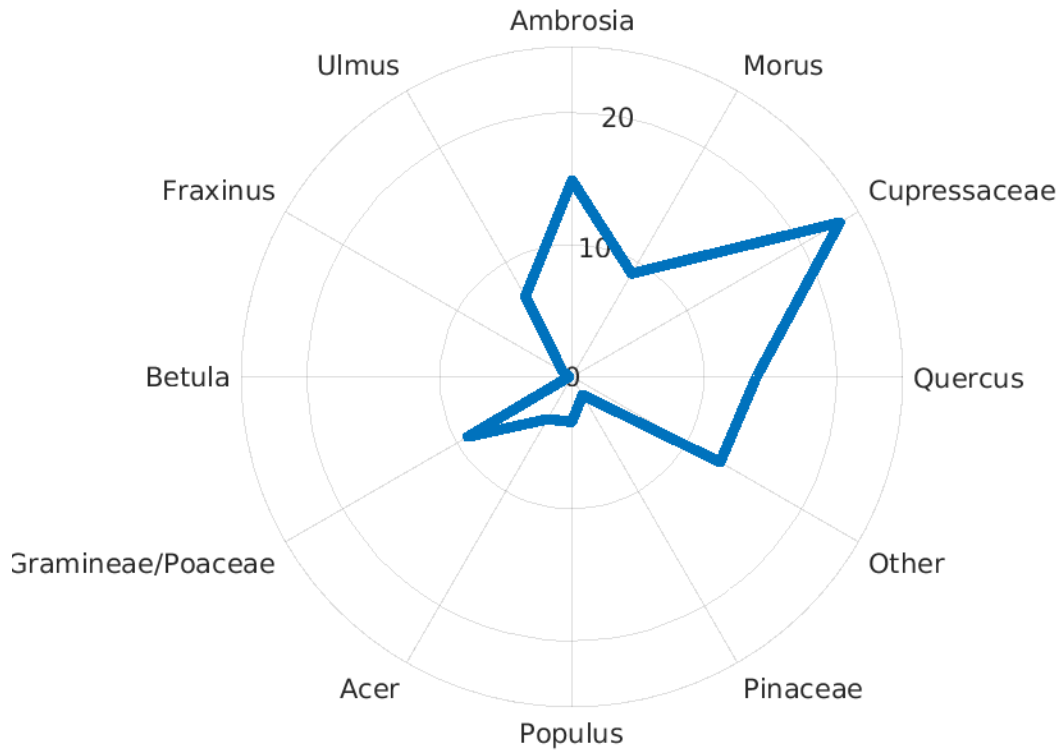

108

**Rochester NY: Percent of total APIn**

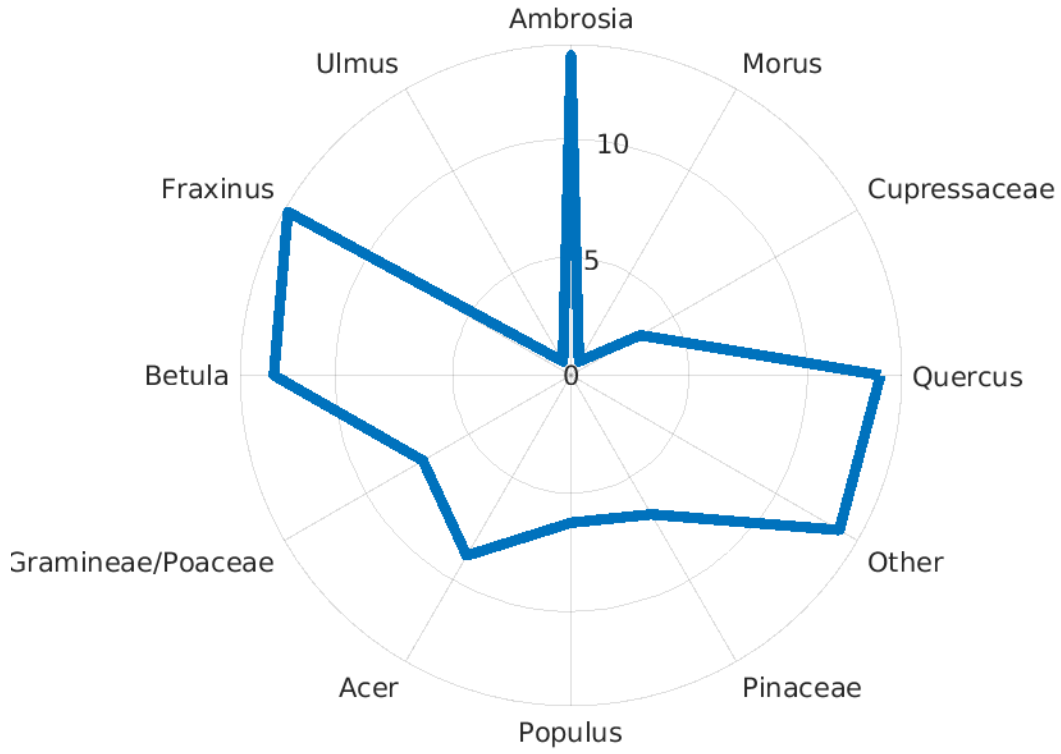

109

**Saint Louis MO: Percent of total APIn**

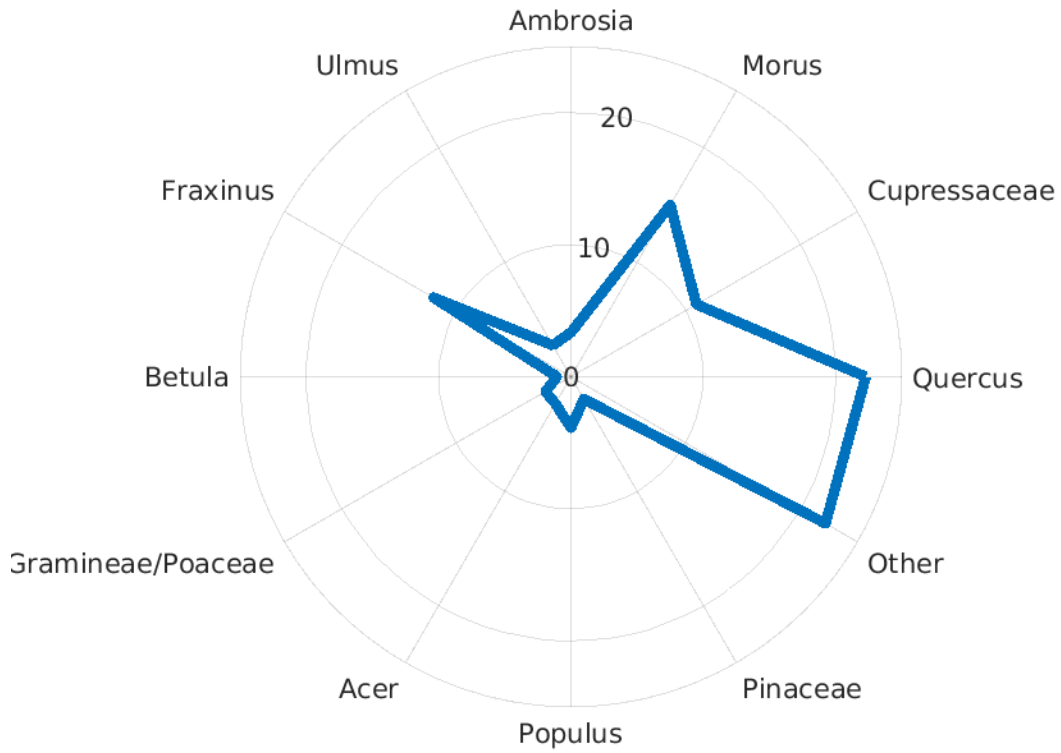

110

**San Antonio TX: Percent of total APIn**

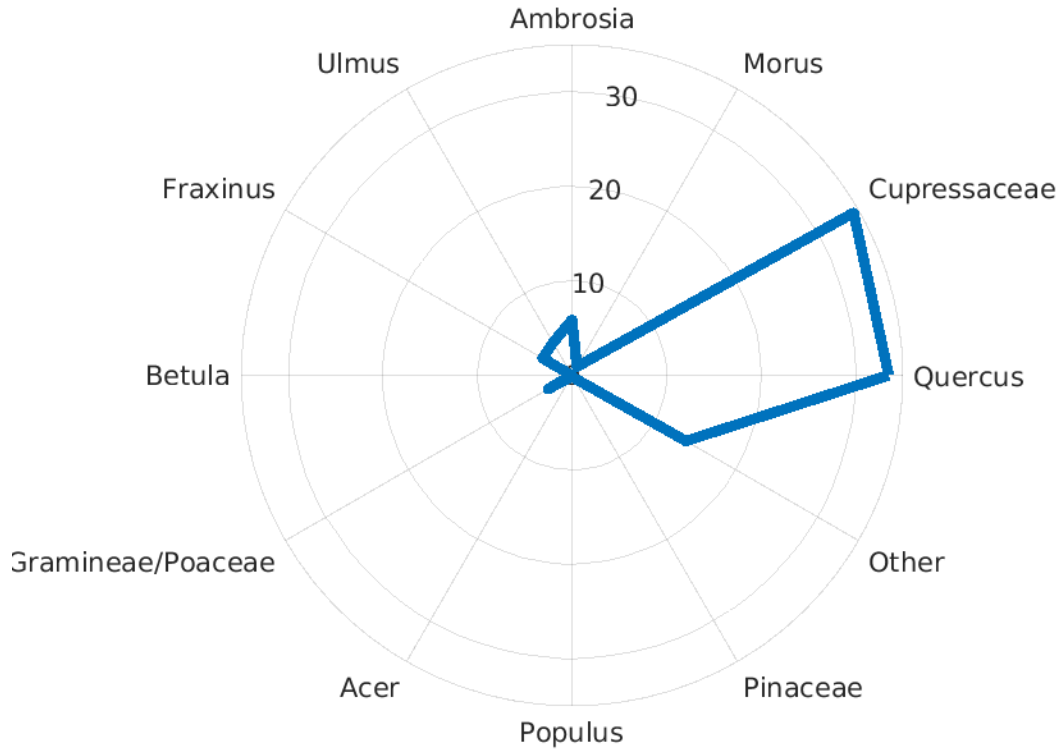

111

**San Jose CA: Percent of total APIn**

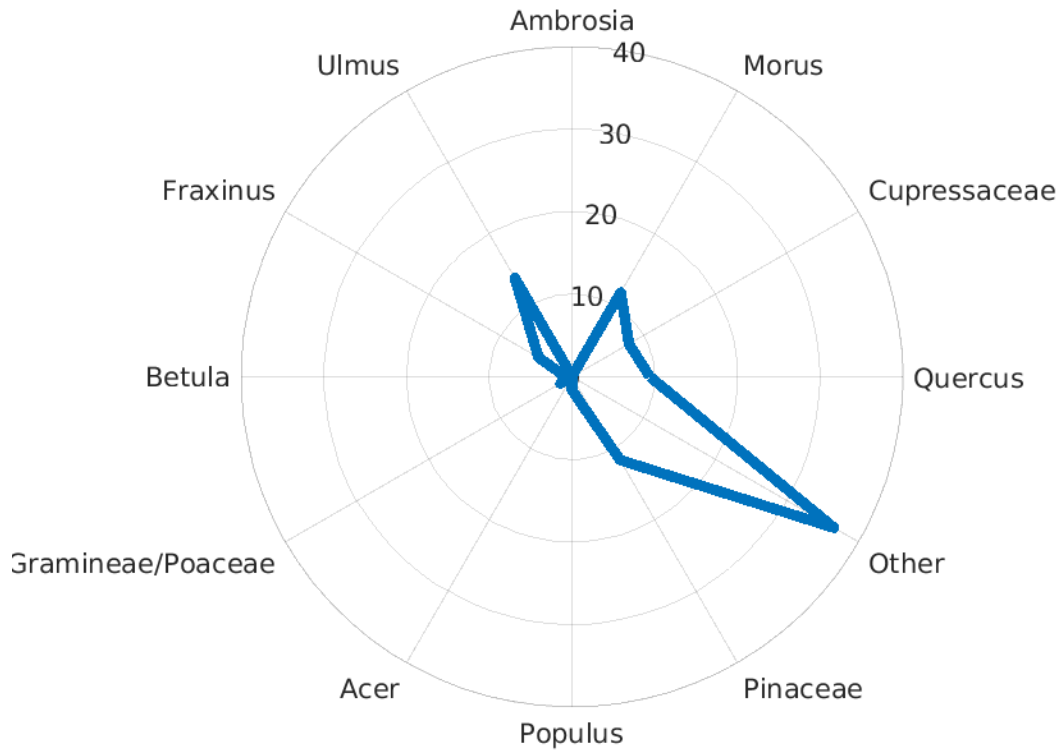

112

**Seattle WA: Percent of total APIn**

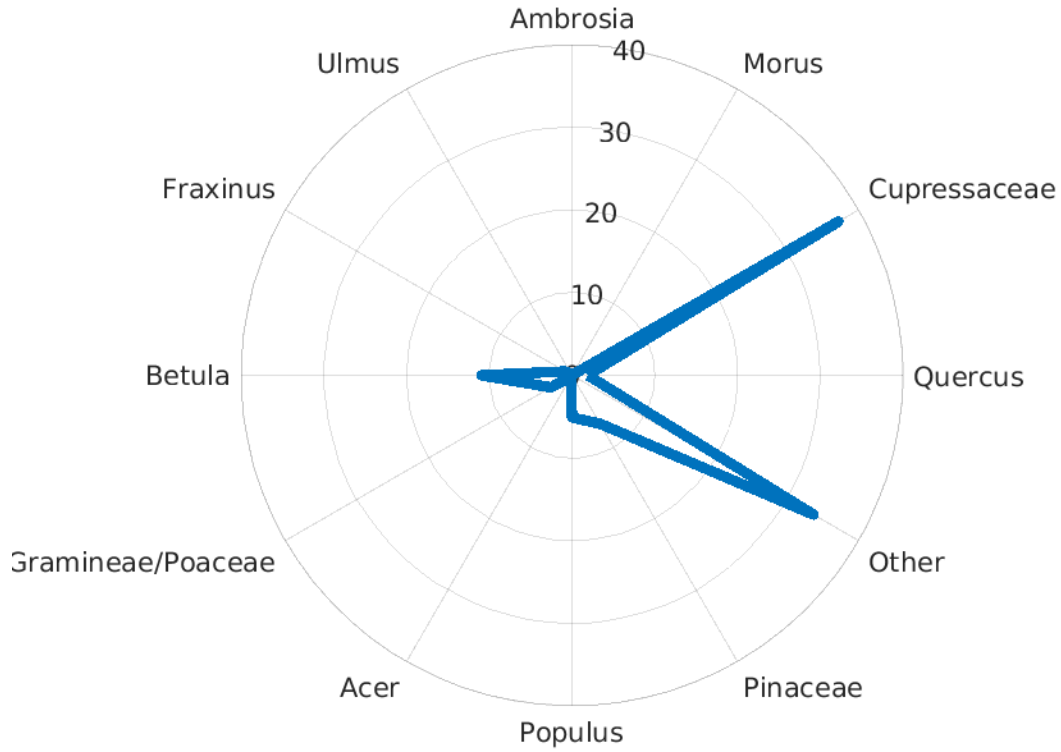

113

**Springfield MO: Percent of total APIn**

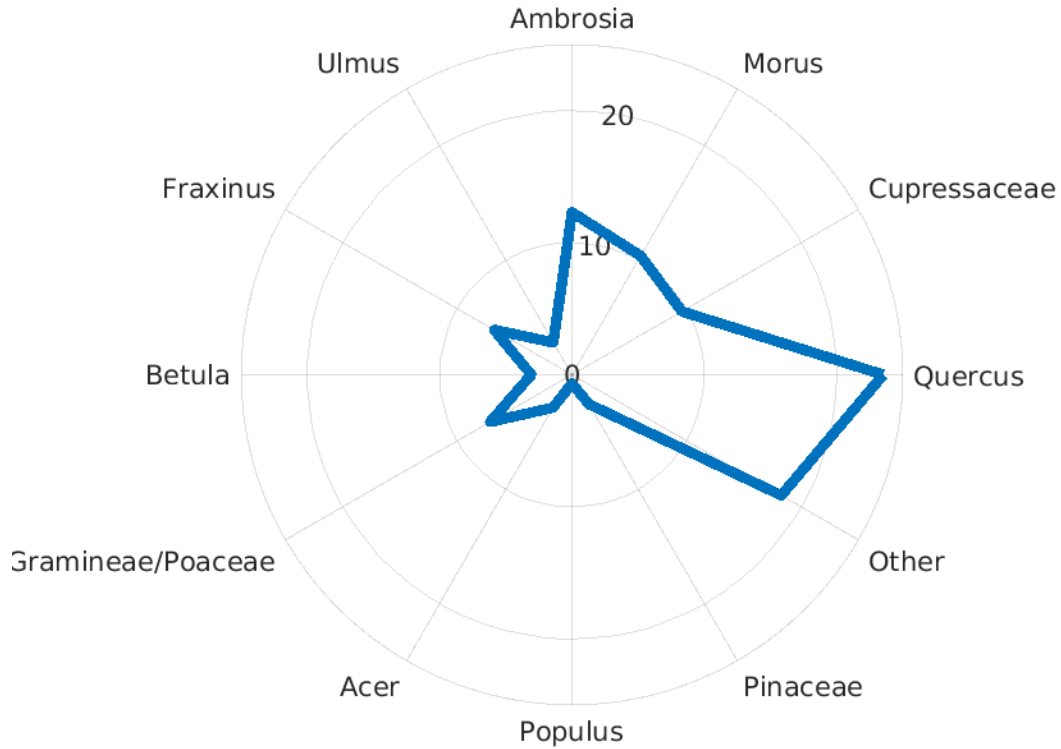

114

**Tulsa OK: Percent of total APIn**

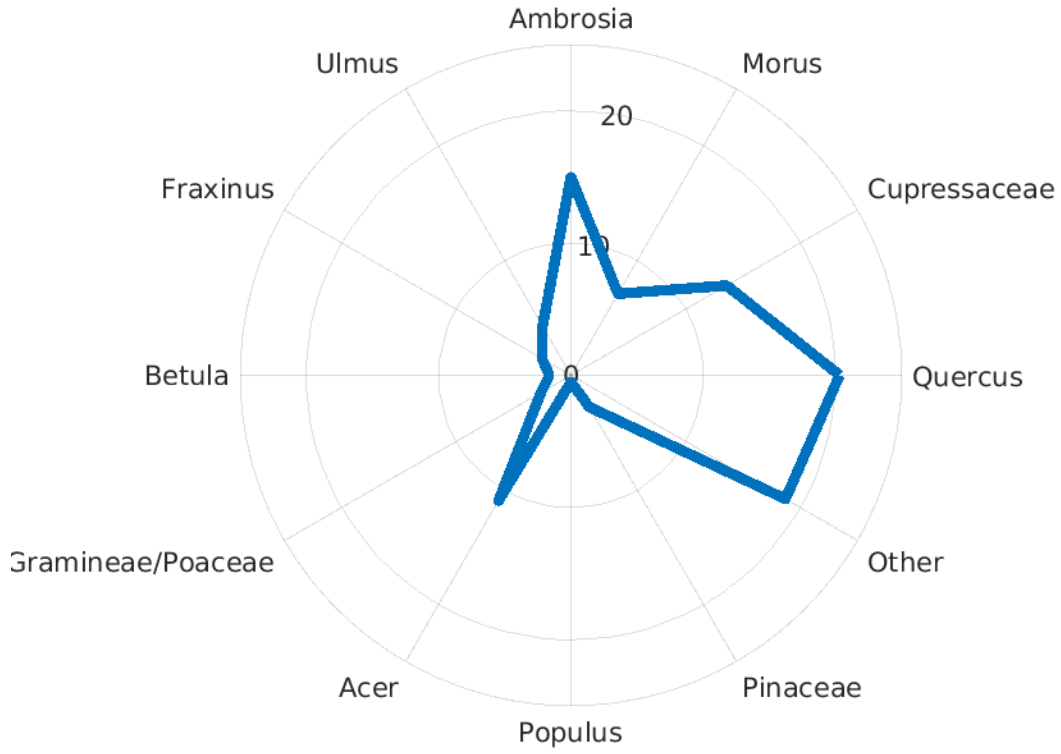

115

**Twin Falls ID: Percent of total APIn**

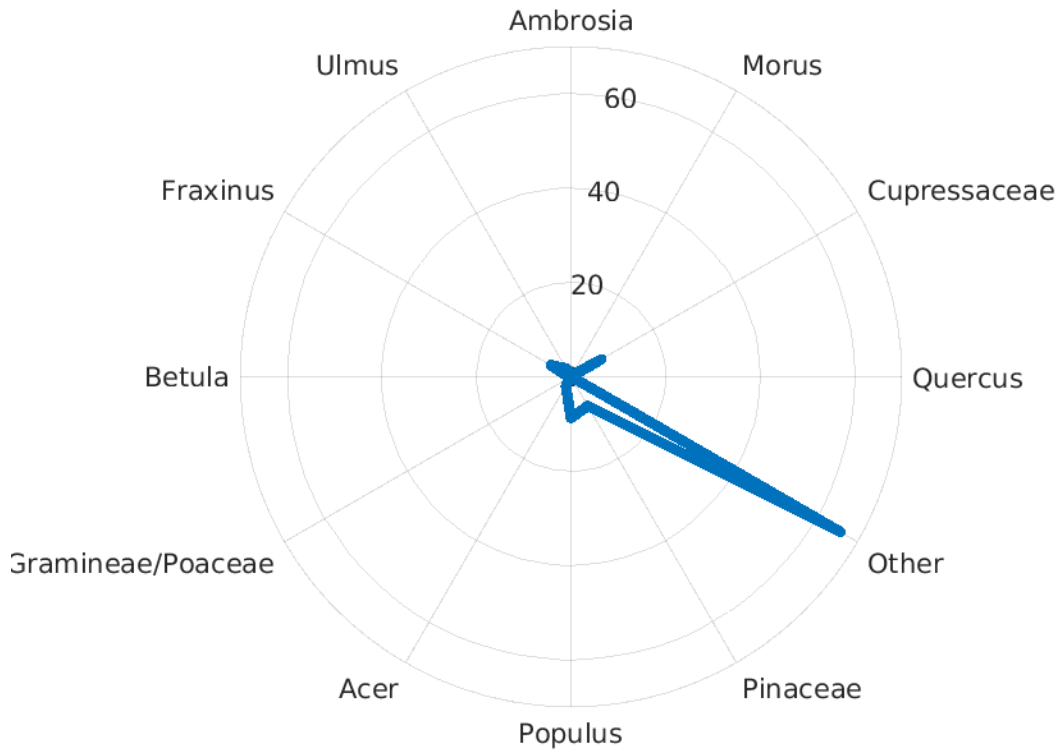

116



**Waco TX: Percent of total APIn**

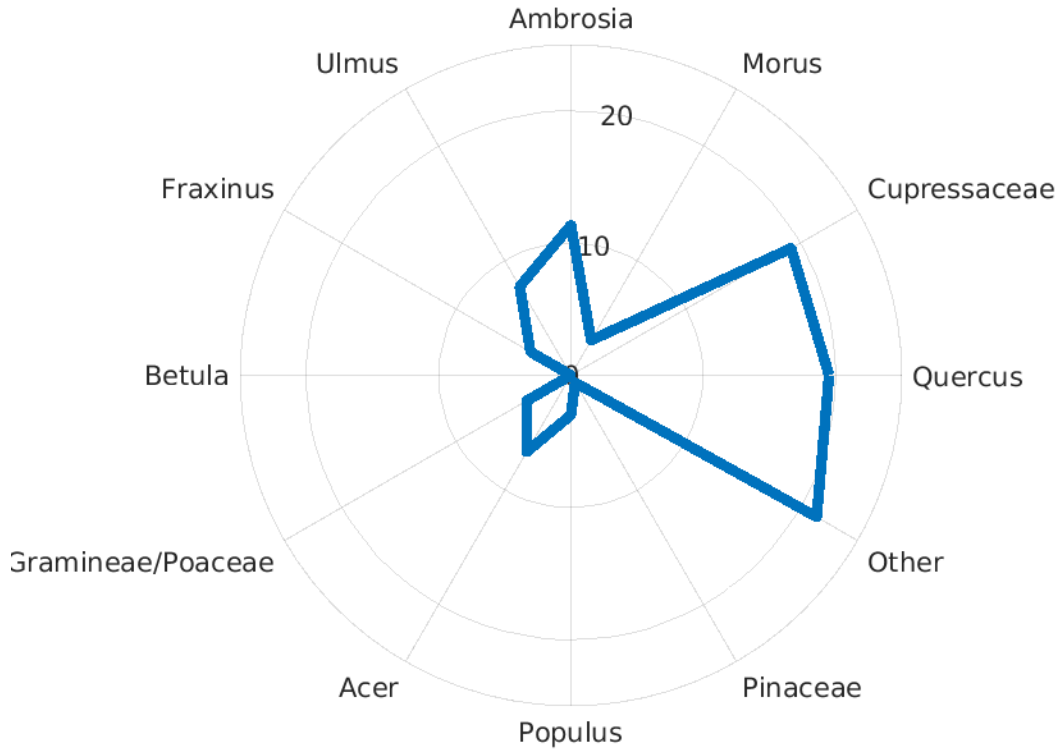

117

**Washington DC: Percent of total APIn**

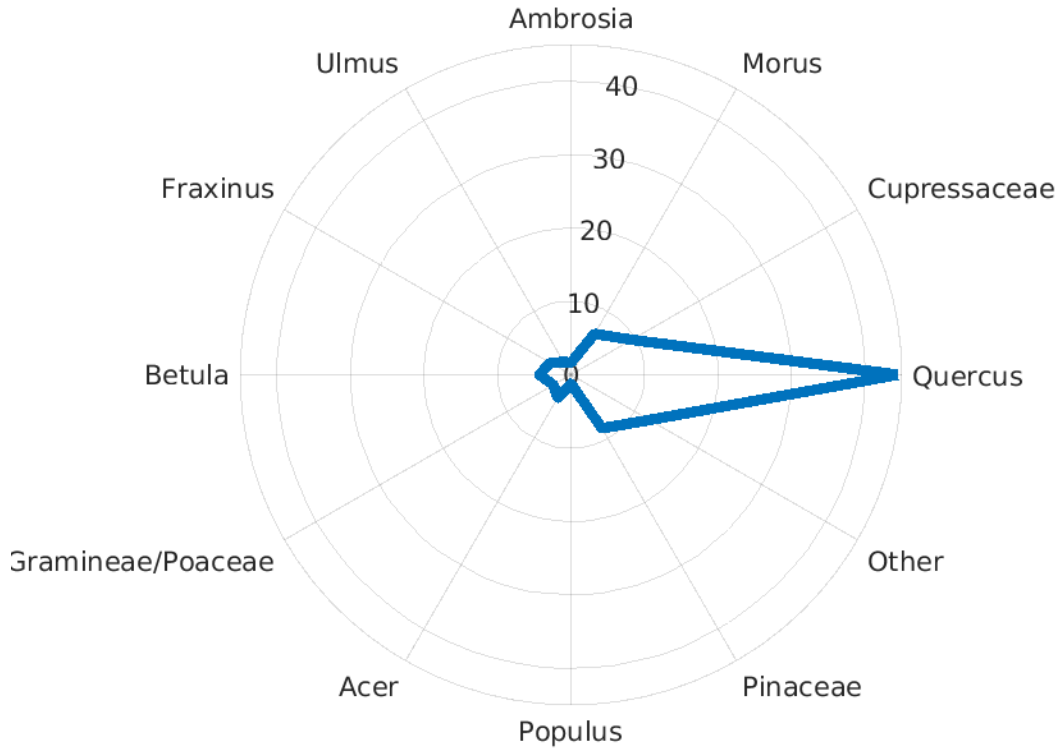

118

**Waterbury CT: Percent of total APIn**

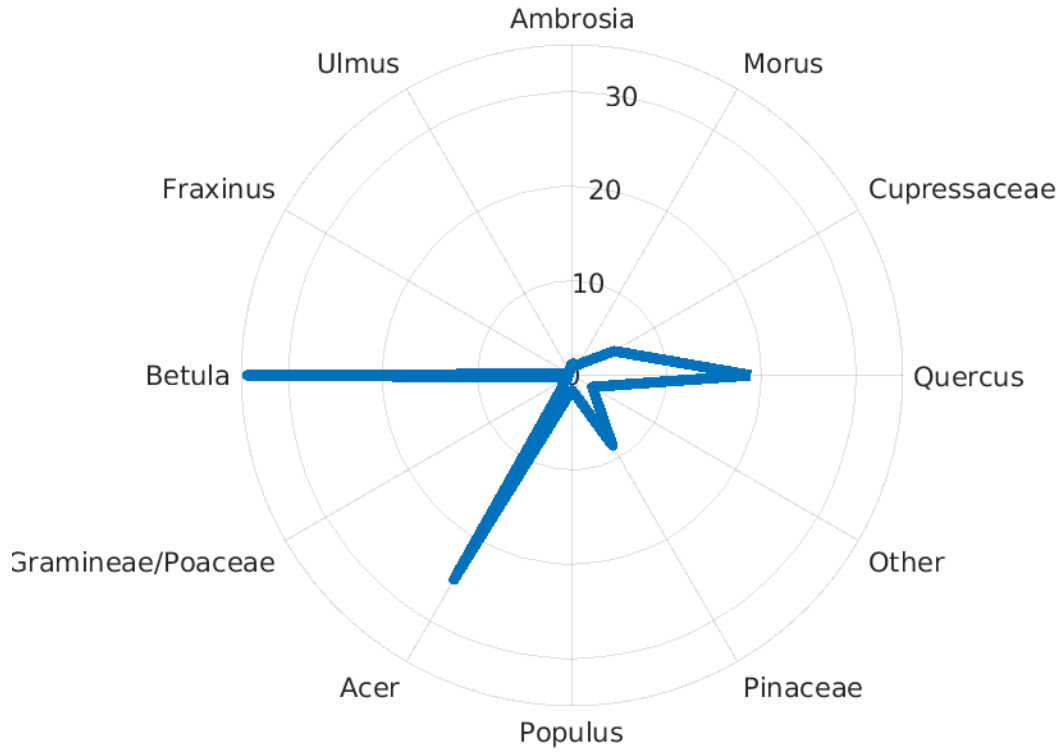

119

**York PA: Percent of total APIn**

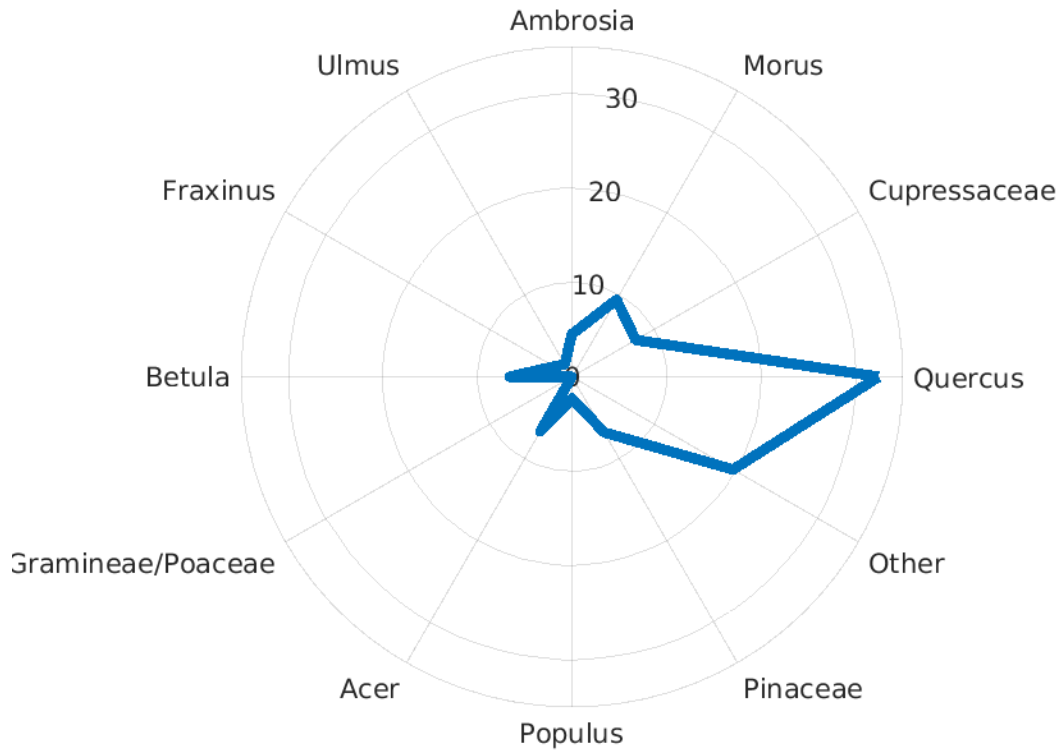

120
